1 **Comparison between the Smart Triage model and the Emergency Triage Assessment and Treatment**  
2 **(ETAT) guidelines in triaging children presenting to the emergency departments of two public**  
3 **hospitals in Kenya.**

4  
5 Stephen Kamau<sup>1\*</sup>, Joyce Kigo<sup>1</sup>, Paul Mwaniki<sup>1</sup>, Dustin Dunsmuir<sup>2,3</sup>, Yashodani Pillay<sup>2,3</sup>, Cherri Zhang<sup>3</sup>,  
6 Brian Nyamwaya<sup>1</sup>, David Kimutai<sup>4</sup>, Mary Ouma<sup>4</sup>, Ismael Mohammed<sup>4</sup>, Keziah Gachuhi<sup>4</sup>, Mary Chege<sup>5</sup>,  
7 Lydia Thurania<sup>5</sup>, J Mark Ansermino<sup>2,3</sup>, Samuel Akech<sup>1</sup>.

8  
9  
10 <sup>1</sup>Health Service Unit, KEMRI-Wellcome Trust Research Program, Nairobi, Kenya.

11 <sup>2</sup>Anesthesiology, Pharmacology and Therapeutics, University of British Columbia, Vancouver,  
12 Canada.

13 <sup>3</sup>Institute for Global Health, British Columbia's Children's and Women's Hospital, Vancouver, Canada.

14 <sup>4</sup>Department of Paediatrics, Mbagathi County Hospital, Nairobi, Kenya.

15 <sup>5</sup>Department of Paediatrics, Kiambu County Referral Hospital, Kiambu, Kenya.

16 **\*Corresponding author**

17 Email: [skamau@kemri-wellcome.org](mailto:skamau@kemri-wellcome.org)

18 **Abstract**

19 Several triage systems have been developed, but little is known about their performance in  
20 low-resource settings. Evaluating and comparing novel triage systems to existing triage scales  
21 provides essential information about their added value, reliability, safety, and effectiveness before  
22 adoption. This prospective observational study included children aged < 15 years who presented to  
23 the emergency departments of two public hospitals in Kenya between February and December  
24 2021. We compared the performance of Emergency Triage Assessment and Treatment (ETAT)  
25 guidelines and Smart Triage (ST) models (*ST-only model*, *ST model with independent triggers*, and  
26 *recalibrated ST model with independent triggers*) in categorizing children into emergency, priority,  
27 and non-urgent triage categories. We visualized changes in classification of participants using Sankey  
28 diagrams. 5618 children were enrolled, and the majority (3113, 55.4%) were aged between one and  
29 five years of age. Overall admission and mortality rates were 7% and 0.9%, respectively. ETAT  
30 classified less children, 513 (9.2%), into the emergency category compared to 790 (14.1%), 1163

NOTE: This preprint reports new research that has not been certified by peer review and should not be used to guide clinical practice.

31 (20.8%) and 1161 (20.7%) by the *ST-only model*, *ST model with independent triggers* and *recalibrated*  
32 *model with independent triggers*, respectively. *ETAT* also classified more children, 3089 (55.1%), into  
33 the non-urgent triage category compared to 2442 (43.6%), 2097 (37.4%) and 2617 (46.7%) for the  
34 respective *ST models*. *ETAT* classified 191/395 (48.4%) of admitted patients as emergency compared  
35 to more than half by all the *ST models*. *ETAT* and the *ST-only model* classified 25/49 (51%) children  
36 who died as emergencies, while the *ST models with independent triggers* classified 39/49 (79.6%)  
37 children as emergencies. Smart Triage shows potential for identifying critically ill children in low-  
38 resource settings, particularly when combined with independent triggers. Additionally, it performs  
39 comparably to *ETAT*. Evaluation of Smart Triage in other contexts and comparison to other triage  
40 systems is required.

41 **Keywords:** Triage, critically ill, *ETAT*, children, emergency department, Kenya.

42

### 43 **Author summary**

44 Prioritizing children according to the level of severity of illness in the outpatient department  
45 is crucial to ensure very sick children are identified and receive life-saving treatment while those with  
46 less severe symptoms can safely wait in the queue. Appropriate triage prevents avoidable paediatric  
47 mortality. As new triage systems are developed, it is essential to evaluate their performance before  
48 being used by healthcare professionals to manage patients. In this study, we compared a newly  
49 developed triage algorithm, Smart Triage, to the World Health Organization's Emergency Triage  
50 Assessment and Treatment (*ETAT*) guidelines. Here, we highlight how participants were categorised  
51 into emergency, priority, and non-urgent categories by both triage systems. We also assessed changes  
52 in triage categorization by comparing the Smart Triage model only (with and without site specific  
53 recalibration) and the model with independent emergency and priority triggers aligned with *ETAT*. Our  
54 study shows that Smart Triage had comparable performance to *ETAT*, and it can be used to triage  
55 children in resource-limited settings. Smart Triage can be integrated into a digital device allowing

56 frontline healthcare workers to rapidly triage children presenting to the outpatient department and  
57 recognize very sick children faster, so that they can be treated in a timely manner.

## 58 **Introduction**

59 Overcrowding is a major global problem in many emergency departments (ED) (1,2). This is  
60 compounded by lack of validated triage systems that can help health workers distinguish between low  
61 and high-priority patients, along with poor adherence to existing triage protocols (3). Triage is a vital  
62 component of effective and efficient emergency care for children presenting to health facilities with  
63 varying severity of illness. Triage categorizes patients according to the severity of their illness and  
64 designates a level of urgency that includes non-urgent, priority, and emergency cases that require  
65 immediate medical attention (4).

66 Rapid triage of critically ill patients can reduce the waiting time for children needing life-saving  
67 treatment by distinguishing them from non-urgent patients who can safely wait in the queue for  
68 assessment and treatment by health workers (5,6). However, in resource-limited settings, triage  
69 remains underused, especially in paediatric emergency care, owing to significant barriers such as  
70 inadequate staffing, the complexity of guidelines, social and organizational context, and lack of  
71 capacity (7–9). Consequently, the sickest children are not prioritized, resulting in delayed care and  
72 inefficient resource utilization.

73 Several paediatric triage systems have been developed and adopted in high and low-income  
74 settings to help frontline health workers improve triage accuracy (10–14). One of the most widely  
75 implemented triage systems is the World Health Organization’s (WHO) Emergency Triage Assessment  
76 and Treatment (*ETAT*) guidelines, which are recommended for use in resource-constrained settings  
77 (15,16). The *ETAT* system provides a systematic and objective approach to triaging children using  
78 clinical signs to identify emergency, priority, and non-urgent cases. However, the implementation of  
79 *ETAT* in clinical practice has faced a myriad of challenges, including a high turnover of trained staff,  
80 lengthy and high-intensity training, and limited resources to support implementation (17,18).

81 A new paediatric triage model, Smart Triage, was recently developed based on the data  
82 collected from a hospital in Uganda (19). This is a logistic regression model based on nine variables  
83 that were selected from over 100 demographic, vital sign measurements, symptoms, and socio-  
84 demographic variables collected upon arrival at the hospital. This model provides the probability of  
85 admission. The prediction model addresses some of the challenges associated with the  
86 implementation of *ETAT* by utilizing a limited number of predictors to identify critically ill children and  
87 can be used by frontline health workers with limited training and expertise. Moreover, the model can  
88 be integrated into digital health platforms to minimize the need for memorization of triage protocols  
89 and training of triage staff. Implementation of the model as a triage system should also incorporate a  
90 set of independent emergency and priority triggers, as in other triage systems, such as *ETAT*. These  
91 triggers include rare emergency conditions and ensure that children who would have been  
92 misclassified by the model are safely assigned to either emergency or priority categories.

93 It is imperative to evaluate the performance of new triage systems and, if possible, to compare  
94 them with existing systems before clinical adoption. Assessment of a triage system's performance  
95 should be based on its ability to differentiate between low and high acuity patients as they present to  
96 the ED, thus minimizing misclassification of patients. Misclassification of low acuity patients into the  
97 high acuity category misuses scarce resources and increases the waiting time for more urgent patients.  
98 On the other hand, misclassification of high acuity patients into a low acuity category may result in  
99 delayed assessment, diagnosis, and treatment, and potentially poorer outcomes (4,20). Compared  
100 with existing paper-based guidelines, electronic triage systems provide valuable information to  
101 policymakers and health workers regarding the safety, reliability, and effectiveness of a triage system  
102 within a particular setting. Furthermore, potential research gaps and areas of improvement can be  
103 identified during the evaluation.

104 The purpose of this study was to compare the performance of *ETAT* to Smart Triage in  
105 classifying children into triage categories using prospectively collected paediatric data from two

106 Kenyan public hospitals. This comparison can provide validation and performance trade-offs of the  
107 new triage model compared with the *ETAT* algorithm and inform its utility in low-resource settings.

## 108 **Materials and Methods.**

### 109 **Study design.**

110 This prospective observational study was conducted at the emergency department (ED) of  
111 Mbagathi County Hospital and Kiambu County Referral Hospital in Kenya between February 2021 and  
112 December 2021. This study was part of a multisite clinical study aimed at developing and exploring  
113 the use of a paediatric rapid sepsis trigger (PRST) tool. The detailed design and methods of the primary  
114 study have been described elsewhere (21).

### 115 **Study setting**

116 Mbagathi County Hospital and Kiambu County Referral Hospital are first-level referral  
117 hospitals located in Nairobi and Kiambu counties, respectively. The outpatient departments in both  
118 hospitals serve approximately 20,000 children annually. Each ED is managed by a qualified nurse who  
119 triages children and an additional nurse who administers treatment in the emergency room. In  
120 addition, one or two clinical officers (equivalent to physician assistants) provide consultation and  
121 decide on the appropriate management of the children. Children triaged as emergency cases by  
122 hospital staff are transferred directly to the emergency room, while the rest wait in the queue. Both  
123 hospitals admit children to a paediatric ward where provision of care is led by a paediatrician and the  
124 clinical team consists of medical officers, nurses, and medical and clinical officer interns. Children who  
125 are critically ill and require intensive care are referred to a tertiary hospital for specialized care.

### 126 **Population, eligibility, and study procedures.**

127 All children aged < 15 years who presented to the ED with an acute illness were eligible to  
128 participate. Children scheduled for immunization, elective surgery, wound dressing changes, or clinical  
129 review appointments were excluded. Children presenting to the emergency department with an acute  
130 illness on weekdays between 8 am and 5 pm were screened for eligibility by study timekeepers and  
131 given a sticker showing their arrival time. A systematic sampling method based on 30 minutes time

132 cut-off was adopted to avoid sampling bias. Informed consent was obtained from the caregiver or  
133 parent of the first eligible patient at each time cutoff, and assent was obtained from children aged >  
134 13 years. Informed consent and data collection for patients in need of emergency care were deferred,  
135 and obtained after the child was stable, to avoid delays.

136 The study nurses performed clinical examinations and collected data using a password-  
137 protected custom-built android application installed on a Samsung Galaxy A8® tablet. Heart rate (HR)  
138 and blood oxygen saturation (SpO<sub>2</sub>) were recorded using a Masimo iSpO<sub>2</sub>® pulse oximeter connected  
139 to the tablet, and respiratory rate was measured using a version of RRate (22) built directly into the  
140 Android data collection application. The children were then reviewed by a qualified clinician who  
141 independently decided on the appropriate management. The study nurses recorded hospital  
142 outcomes including patient disposition from the hospital records and uploaded the data to a secure  
143 REDCap database (23) hosted on the KEMRI Wellcome Trust Research Programme (KWTRP) server.  
144 Children who were sent home from the ED on the day of enrolment and those who were admitted  
145 were followed up via a telephone call seven days after the initial visit or after discharge from the  
146 hospital to ascertain the outcome.

#### 147 **Triage systems**

##### 148 **ETAT**

149 This triage system uses clinical signs to assign a triage category depending on the level of  
150 illness severity. Frontline health workers identify emergency signs using an “ABCD” method, where A  
151 and B symbolize airway and breathing problems, C represents circulation, convulsions, and coma,  
152 while D denotes severe dehydration. Children presenting to the hospital with life-threatening  
153 problems that require immediate life-saving treatment are assigned to the emergency category, while  
154 children requiring urgent review by the health worker (from a set of clinical signs) are assigned a  
155 priority category. All other children are classified as non-urgent and can safely wait in the queue (Table  
156 1).

157 **Table 1:** Clinical signs and categories of the *ETAT* triage system and how they were mapped to our  
158 dataset.

| Presenting clinical signs used in ETAT triage                                                                                                    | Presenting clinical signs available in the study data                                                                                                                                    | Intervention                 |
|--------------------------------------------------------------------------------------------------------------------------------------------------|------------------------------------------------------------------------------------------------------------------------------------------------------------------------------------------|------------------------------|
| <b>Emergency</b>                                                                                                                                 |                                                                                                                                                                                          | Requires immediate treatment |
| Obstructed/absent breathing                                                                                                                      | Not available in the baseline dataset                                                                                                                                                    |                              |
| Central cyanosis                                                                                                                                 | Cyanosis                                                                                                                                                                                 |                              |
| Severe respiratory distress                                                                                                                      | O <sub>2</sub> saturation < 90% OR cyanosis OR grunting OR stridor.                                                                                                                      |                              |
| <b>Circulation</b><br>Capillary refill >3 seconds AND<br>Weak and fast (or absent) pulse AND<br>Cool skin                                        | <b>Circulation</b><br>Capillary refill >3 seconds AND (Weak central pulse OR Weak radial pulse) AND<br>Cool skin                                                                         |                              |
| Convulsions                                                                                                                                      | Convulsions (now)                                                                                                                                                                        |                              |
| Coma                                                                                                                                             | Not alert (based on AVPU scale)                                                                                                                                                          |                              |
| <b>Severe dehydration</b><br>Diarrhoea plus any two positive signs<br>(Lethargy, sunken eyes, unable to drink or drinks poorly, slow skin pinch) | <b>Severe dehydration</b><br>Diarrhoea plus any two positive signs<br>(sunken eyes, can't sit or drink, slow skin pinch)                                                                 |                              |
| <b>Priority</b>                                                                                                                                  |                                                                                                                                                                                          | Requires prompt assessment   |
| Tiny infant (age < 2 months)                                                                                                                     | Tiny infant (age < 2 months)                                                                                                                                                             |                              |
| Temperature ≥37.5°C                                                                                                                              | Temperature ≥37.5°C                                                                                                                                                                      |                              |
| Trauma                                                                                                                                           | Trauma                                                                                                                                                                                   |                              |
| Severe pallor                                                                                                                                    | Pallor                                                                                                                                                                                   |                              |
| Severe pain                                                                                                                                      | Severe pain                                                                                                                                                                              |                              |
| Poisoning                                                                                                                                        | Poisoning                                                                                                                                                                                |                              |
| Respiratory distress                                                                                                                             | Chest indrawing<br>OR<br>fast breathing<br>(age < 2 months = RR > 60 breaths per minute<br>age 2-11 months = RR > 50 breaths per minute<br>age ≥ 12 months = RR > 40 breaths per minute) |                              |
| Urgent referral                                                                                                                                  | Urgent referral                                                                                                                                                                          |                              |
| Restless, continuously irritable or lethargic                                                                                                    | Irritable                                                                                                                                                                                |                              |
| Malnutrition - visible severe wasting                                                                                                            | Visible severe wasting                                                                                                                                                                   |                              |
| Oedema of both feet or face                                                                                                                      | Oedema                                                                                                                                                                                   |                              |

|                                         |                                        |                    |
|-----------------------------------------|----------------------------------------|--------------------|
| Burns                                   | Burns                                  |                    |
| <b>Non-urgent</b>                       |                                        | Waits in the queue |
| A child without any of the above signs. | A child without any of the above signs |                    |

159  
160

### Smart Triage

161 This logistic regression model incorporates nine predictors (five continuous and four  
162 categorical variables) implemented in a digital device (24). The predictors are age, temperature, heart  
163 rate, transformed oxygen saturation, mid-upper arm circumference (MUAC), difficulty breathing,  
164 pallor, oedema, and parental concern. The model uses low-risk and high-risk thresholds to categorize  
165 children into three triage categories (emergency, priority, and non-urgent). The original model has a  
166 low-risk threshold of 8% and high-risk threshold of 40%. This model was previously recalibrated using  
167 data from Mbagathi County Hospital which resulted in new thresholds of 2.6% and 13% for low-risk  
168 and high-risk thresholds, respectively (manuscript under review). These thresholds were selected to  
169 ensure that the model had sensitivity > 80% for identifying high-risk patients.  
170 Furthermore, independent emergency and priority triggers (Table 2) were included in a mobile  
171 application for the *Smart Triage model* to allow for its safe clinical implementation. The *recalibrated*  
172 *model with independent triggers* is currently being implemented and evaluated at the Mbagathi  
173 County Hospital in Kenya.

174 **Table 2:** Independent emergency and priority triggers included in the Smart Triage.

| Emergency triggers                                                                                                                                                                                                                                                                                                                                                                                                                                                                                            | Priority triggers                                                                                                                                                                                                                                                                                                                                                                                                                                      |
|---------------------------------------------------------------------------------------------------------------------------------------------------------------------------------------------------------------------------------------------------------------------------------------------------------------------------------------------------------------------------------------------------------------------------------------------------------------------------------------------------------------|--------------------------------------------------------------------------------------------------------------------------------------------------------------------------------------------------------------------------------------------------------------------------------------------------------------------------------------------------------------------------------------------------------------------------------------------------------|
| <ul style="list-style-type: none"> <li>• Unresponsive</li> <li>• Convulsion</li> <li>• Shock (Cool hands with Capillary refill &gt; 3 sec or Weak and fast pulse)</li> <li>• Major trauma</li> <li>• Severe pain</li> <li>• Not breathing</li> <li>• Obstructed breathing</li> <li>• Central cyanosis</li> <li>• Dehydration (At least 2 of sunken eyes, skin pinch taking longer than 2 seconds, or lethargy)</li> <li>• Heart Rate (HR &lt; 45 bpm)</li> <li>• Oxygen Saturation (SpO2 &lt; 90%)</li> </ul> | <ul style="list-style-type: none"> <li>• Trauma or other injury</li> <li>• Burn</li> <li>• Poisoning</li> <li>• Urgent referral</li> <li>• Difficulty breathing (such as Not eating or drinking due to respiratory problems, Chest indrawing, Accessory muscle use, or Head nodding)</li> <li>• Irritable</li> <li>• Respiratory Rate (RR &gt; 60 bpm)</li> <li>• Temperature (Temp &gt; 40°C or Temp &lt; 35°C)</li> <li>• MUAC &lt; 115mm</li> </ul> |

175  
176

### Data analysis.



177 Using data collected from children at Mbagathi County Hospital and Kiambu County Referral  
178 Hospital, demographic characteristics were summarized as frequencies, percentages, proportions,  
179 medians, and corresponding interquartile ranges (IQR). A classification table was used to compare the  
180 distribution of participants into three triage categories according to the ETAT guidelines: the *ST- only*  
181 *model*, the *ST model with independent triggers*, and the *recalibrated ST model with independent*  
182 *triggers*. The change in the classification of the participants into different triage categories was  
183 visualized using Sankey diagrams. Smart Triage categories were calculated in Microsoft Excel 2016  
184 (Microsoft, Richmond WA) and then data transferred to R 4.3.0 (R Foundation for Statistical  
185 Computing, Vienna, Austria) for final statistical analysis.

#### 186 **Ethics statement.**

187 The study was approved by the Kenya Medical Research Institute (KEMRI) Scientific and Ethics  
188 Review Unit (SERU/3958) and Institutional Review Boards at the University of British Columbia in  
189 Canada (ID: H19-02398; H20-00484).

## 190 **Results**

### 191 **Participant characteristics**

192 A total of 5920 children (Fig 1) were evaluated for eligibility, of whom 5618 (94.9%) were  
193 enrolled in the study. A total 3041 (54.1%) participants were male, and the median age was 20.7  
194 months (IQR 9.0-42.0). Of the enrolled participants, 383 (6.8%) were admitted on the day of enrolment  
195 and 11 (0.2%) were readmitted within 48 hours after discharge from the ED (Fig 1). The median length  
196 of hospital stay was 6 days (IQR 3-8) (Table 3). Cough was the most common presenting complaint  
197 among the participants (1647, 29.4%), while pneumonia was the primary reason for admission (220,  
198 57.4%) (Table 3). Overall, 49 (0.9%) participants died during the study period (Table 3).

199 **Table 3: Participant characteristics**

| <b>Patient characteristics</b> | <b>n (%)</b> |
|--------------------------------|--------------|
| Enrolled                       | 5618         |
| <b>Gender</b>                  |              |
| Male                           | 3041 (54.1)  |
| Female                         | 2577 (45.9)  |
| <b>Age</b>                     |              |

|                                                                                 |                 |
|---------------------------------------------------------------------------------|-----------------|
| Age in months (Median, IQR)                                                     | 20.7 (9.0-42.0) |
| < 1 month                                                                       | 182 (3.2)       |
| 1 – 12 months                                                                   | 1653 (29.4)     |
| 1 – 5 years                                                                     | 3113 (55.4)     |
| 5 - 12 years                                                                    | 605 (10.8)      |
| >12 years                                                                       | 65 (1.2)        |
| Duration of symptoms in days (Median, IQR)                                      | 3 (2-5)         |
| Length of hospital stay in days (Median, IQR)                                   | 6 (3-8)         |
| <b>Patient disposition</b>                                                      |                 |
| Discharged from the outpatient department                                       | 5222 (93)       |
| Admitted on the day of enrolment                                                | 383 (6.8)       |
| Missing hospital outcome                                                        | 13 (0.2)        |
| Mortality during the study period                                               | 49 (0.9)        |
| <b>Primary presenting complaint <sup>a</sup></b>                                |                 |
| Cough                                                                           | 1647 (29.4)     |
| Fever                                                                           | 903 (16.1)      |
| Nasal Congestion                                                                | 489 (8.7)       |
| Difficulty breathing                                                            | 376 (6.7)       |
| Diarrhea                                                                        | 321 (5.7)       |
| Vomiting                                                                        | 298 (5.3)       |
| Abdominal pain                                                                  | 241 (4.3)       |
| Skin rash                                                                       | 224 (4.0)       |
| Trauma                                                                          | 217 (3.9)       |
| Swelling                                                                        | 148 (2.6)       |
| Other (e.g., headache, feeding poorly, jaundice, constipation, runny nose etc.) | 752 (13.4)      |
| <b>Admission diagnosis <sup>b</sup></b>                                         |                 |
| Pneumonia                                                                       | 220 (57.4)      |
| Dehydration                                                                     | 30 (7.8)        |
| Jaundice                                                                        | 27 (7)          |
| Convulsions                                                                     | 19 (5)          |
| Neonatal sepsis                                                                 | 13 (3.4)        |
| Meningitis/encephalitis or other central nervous system (CNS) infection         | 12 (3.1)        |
| Malnutrition                                                                    | 10 (2.6)        |
| Malaria                                                                         | 6 (1.6)         |
| Gastroenteritis/Diarrhea                                                        | 6 (1.6)         |
| Septicaemia                                                                     | 6 (1.6)         |
| Bronchiolitis                                                                   | 4 (1.0)         |
| Any skin or soft tissue infection                                               | 4 (1.0)         |
| Reactive Airway Disease/Asthma                                                  | 1 (0.3)         |
| Other (e.g., intestinal obstruction, hepatomegaly etc.)                         | 25 (6.5)        |

<sup>a</sup> Percentage is based on the total number of participants enrolled. <sup>b</sup> Percentage is based on the total number of admissions.

200

201

**Triage assignment**

202           Of the total number of participants enrolled, 513 (9.2%), 790 (14.1%), 1163 (20.8%), and  
203 1161 (20.7%) were identified as emergency cases by the *ETAT*, *ST- only* model, *ST model with*  
204 *independent triggers*, and *recalibrated ST model with independent triggers*, respectively (Table 4).  
205 *ETAT* categorized the majority of children, 3089 (55.1%), into the non-urgent triage category, unlike  
206 the *ST- only* model, *ST model with independent triggers*, and *recalibrated ST model with independent*  
207 *triggers*, which assigned 2442 (43.6%), 2097 (37.4%) and 2617 (46.7%) children, respectively, into  
208 the non-urgent category. The *ST- only* model and the *ST model with independent triggers* had a  
209 higher proportion of children classified into the priority category, 2373 (42.3%) and 2345 (41.8%),  
210 respectively, compared to *ETAT* and the *recalibrated ST model with independent triggers*, which only  
211 classified 2003 (35.7%) and 1827 (32.6%) children into this category, respectively. The emergency  
212 category had the highest proportion of children who were admitted in all triage systems. For  
213 children who died, both the *ST model with independent triggers* and the *recalibrated ST model with*  
214 *independent triggers* identified 39 (79.6%) as emergency cases, whereas *ETAT* and the *ST- only*  
215 model identified 25 (51.0%) as such.

**Table 4: Distribution of participants and outcomes by triage system.**

| Triage system                           | ETAT         |                |                | Smart Triage only model |                |                | Smart Triage model with independent triggers <sup>a</sup> |                |                | Recalibrated Smart Triage model with independent triggers <sup>b</sup> |                |                |
|-----------------------------------------|--------------|----------------|----------------|-------------------------|----------------|----------------|-----------------------------------------------------------|----------------|----------------|------------------------------------------------------------------------|----------------|----------------|
|                                         | Emergency    | Priority       | Non-urgent     | Emergency               | Priority       | Non-urgent     | Emergency                                                 | Priority       | Non-urgent     | Emergency                                                              | Priority       | Non-urgent     |
| Participants n (%)                      | 513<br>(9.2) | 2003<br>(35.7) | 3089<br>(55.1) | 790<br>(14.1)           | 2373<br>(42.3) | 2442<br>(43.6) | 1163<br>(20.8)                                            | 2345<br>(41.8) | 2097<br>(37.4) | 1161<br>(20.7)                                                         | 1827<br>(32.6) | 2617<br>(46.7) |
| Admission distribution n (%)            | 191(17.7)    | 168(8.4)       | 36(1.2)        | 224(28.4)               | 134(5.6)       | 37(1.5)        | 296(25.5)                                                 | 83(3.5)        | 16(0.8)        | 296(25.5)                                                              | 74(4.1)        | 25(1.0)        |
| Mortality on the day of enrolment n (%) | 4(0.7)       | 2(0.1)         | 0(0)           | 4(0.5)                  | 2(0.1)         | 0(0)           | 5(0.4)                                                    | 1(0)           | 0(0)           | 5(0.4)                                                                 | 1(0)           | 0(0)           |
| In-hospital mortality n (%)             | 13(2.5)      | 8(0.4)         | 0(0)           | 14(1.8)                 | 5(0.2)         | 2(0.1)         | 18(1.5)                                                   | 3(0.1)         | 0(0)           | 18(1.6)                                                                | 3(0.2)         | 0(0)           |
| Mortality during follow-up n (%)        | 8(1.6)       | 12(0.6)        | 2(0.1)         | 7(0.9)                  | 14(0.6)        | 1(0)           | 16(1.4)                                                   | 6(0.3)         | 0(0)           | 16(1.4)                                                                | 6(0.3)         | 0(0)           |

<sup>a</sup> **Original Smart Triage model's thresholds:** Non-urgent  $\leq$  8%, 8% < Priority < 40%, Emergency  $\geq$  40%

<sup>b</sup> **Recalibrated Smart Triage model's thresholds:** Non-urgent  $\leq$  2.6%, 2.6% < Priority < 13%, Emergency  $\geq$  13%

## 218 **Change in participant classification.**

### 219 **Overall**

220 Of the 55.1% participants classified as non-urgent by ETAT, 20.1%, 20.4%, and 12.6% were  
221 reclassified as priority by the *ST-only model*, *ST model with independent triggers*, and *recalibrated ST*  
222 *model with independent triggers*, respectively (Fig 2a-c). Of the ETAT priority cases, 475 (8.5%) were  
223 classified as emergencies by the *ST-only model*. Interestingly, both *ST models with independent*  
224 *triggers* classified 11.7% of the children who had been categorized as priority by ETAT as emergency.  
225 In addition, for the ETAT priority patients, the *ST-only model* assigned more children (465, 8.3%) to  
226 the non-urgent category than the *ST model with independent triggers* and the *recalibrated ST model*  
227 *with independent triggers*. ETAT classified 16 (0.3%) children as non-urgent, while the *ST-only model*  
228 assigned them as emergency (Fig 2a). Similarly, ETAT identified 54 (1%) children as non-urgent, but *ST*  
229 *models with independent triggers* classified them as emergency (Fig 2b-c).

### 230 **Admission**

231 Of ETAT's priority cases, 75/395 (19.0%) and 102/395 (25.8%) of the admitted patients were  
232 classified as emergency by *ST-only model* and both *ST models with independent triggers*, respectively  
233 (Fig 3a-c). The *ST-only model* categorized 41/395 (10.4%) ETAT emergency cases as priority. In  
234 contrast, neither the *ST model with independent triggers* nor the *recalibrated ST model with*  
235 *independent triggers* categorized any ETAT emergency cases as priority. Overall, the majority of  
236 admitted patients were classified into the same triage category using the ETAT and *ST models* (Fig  
237 3a-c).

### 238 **Mortality**

239 The *ST models with independent triggers* categorized 34 of the 49 deaths (69.4%) into the  
240 same triage categories at ETAT (Fig 4). The addition of independent triggers to the Smart Triage  
241 model improved the classification of mortality cases by ensuring that all ETAT emergencies were all  
242 still emergencies. Of the 49 patients who died, 13 (26.5%) were categorized as priority by ETAT and  
243 emergency by the *ST models with independent triggers*, whereas 7 (14.3%) were classified as priority

244 by *ETAT* and emergency by the *ST- only model* (Fig 4). The change in the classification of *ETAT* non-  
245 urgent patients into other triage categories was similar among *ST models with independent triggers*  
246 (Fig 4b-c).

## 247 **Discussion**

248 In this study, we compared the *ETAT* guidelines commonly used in Kenyan public hospitals  
249 and the newly developed Smart Triage model based on their ability to classify children presenting to  
250 the ED into emergency, priority, and non-urgent categories. The major finding based on the selected  
251 model thresholds, was a shift in participants classification from non-urgent to priority to emergency  
252 when moving from *ETAT* to the *ST- only model*. The magnitude of this shift was larger when  
253 independent triggers were added. The emergency category consistently had the highest proportion  
254 of children who were admitted or died across all triage systems.

255 The purpose of paediatric triage is to distinguish children who require urgent intervention by  
256 the clinical team from those who can safely wait in the queue when they present to the emergency  
257 department. As expected in any triage system, the number of emergency cases should be fewer than  
258 priority and non-urgent cases. This was the case in our study, where the proportion of children who  
259 were classified as emergency was lower than those assigned priority and non-urgent categories by  
260 all triage systems. Assignment of fewer patients in the high acuity category is particularly important  
261 to minimize pressure on the already overwhelmed ED. Additionally, the emergency classification  
262 expedites clinical review and intervention for children in need of urgent care, thereby improving  
263 patient outcomes and ensuring the appropriate use of meager resources.

264 The Smart Triage models caused a shift in the distribution of children across the three triage  
265 categories, with more children being assigned priority categories by the *ST- only model* and the *ST*  
266 *model with independent triggers*. Additionally, all *ST models* classified more children into the  
267 emergency category compared to *ETAT*. This was intentionally done with the selection of risk  
268 thresholds used to classify patients into these categories, to maximize the models' sensitivity and  
269 specificity, and to reduce misclassification during triage (19). Furthermore, as the Smart Triage

270 algorithm is a continuous probability, the proportion of cases in the emergency and priority groups  
271 determined by the algorithm can be adjusted to meet the local context and resources.

272 Since there is no absolute measure of acuity, admission and mortality have typically been  
273 employed in research to assess how effectively a triage system performs (24). Similarly, we used  
274 these outcomes as proxies for illness severity. An ideal triage system should categorize children in  
275 need of admission or at a high risk of mortality in the high-acuity category. Our study findings  
276 showed that *ETAT* and *Smart Triage models* accurately identified critically ill children, with most  
277 admissions and deaths assigned to the emergency category. In addition, incorporation of  
278 independent triggers improved the Smart Triage model's ability to classify mortality cases. The *ST*  
279 *model with independent triggers* and the *recalibrated ST model with independent triggers* assigned  
280 all mortality cases to either emergency or priority category compared to *ETAT* and *ST-only model*  
281 which had some mortality cases assigned to the non-urgent category.

282 Smart Triage offers a major advantage over *ETAT* in that it can robustly combine a range of  
283 continuous and categorical variables in a prediction algorithm that would not be possible for even  
284 the most highly trained clinician. The algorithm can also be tuned to optimize the trade-offs  
285 clinicians perform in clinical practice. In the current implementation, a high specificity was selected  
286 to avoid missing critically ill children, especially those in the early stages of critical illness that have  
287 not reached the criteria for priority or emergency status using *ETAT*. This is reflected in the increased  
288 number of children in the priority and emergency categories. However, this must be balanced by  
289 including too many children in the emergency categories and slowing down access to care for  
290 critically ill children with obvious danger signs.

291 The incorporation of independent emergency and priority triggers into the *Smart Triage*  
292 *models* improved the categorization of admissions and mortality cases, as evidenced by the higher  
293 agreement between the *Smart Triage models with independent triggers* and the *ETAT* classification.  
294 Most of these triggers are used in *ETAT* to classify patients into emergency and priority categories  
295 and can explain the reason for the improvement in the categorization of admission and mortality

296 cases. Therefore, this suggests that the inclusion of independent triggers as an additional criterion in  
297 paediatric triage systems that rely on prediction models is essential to avoid missing critically ill  
298 children. The prediction algorithm is not necessary in those children with a single symptom or sign  
299 that indicates a critically ill child. A similar argument has been proposed when comparing early  
300 warning scores to a single extreme observation (25).

### 301 **Limitations**

302 This study has some limitations. Enrollment in the study took place on weekdays between 8  
303 am and 5 pm. The distribution of children in different triage categories may differ from that at other  
304 times of the day and on weekends. We have used proxies for critical illness such as admission, and in  
305 most situations, do not know which triage system was correct. Lastly, the study focused on  
306 evaluating the triage systems' ability to classify children into triage categories and did not assess  
307 other important factors, such as resource utilization.

### 308 **Conclusion**

309 Smart Triage compares well with *ETAT* and has potential as an efficient system for triaging  
310 children and identifying children in need of urgent care, especially when integrated with  
311 independent triggers. The Smart Triage algorithm increased the number of children in the priority  
312 and emergency groups, but marginally reduced the number of non-urgent children who were  
313 admitted or died. The addition of independent triggers to the Smart Triage model further improved  
314 the classification of children at high risk of admission and death. Further research is recommended  
315 to confirm these findings in other settings, such as primary care, and to compare Smart Triage with  
316 other triage systems as well as evaluate its impact on resource utilization.

### 317 **Acknowledgements**

318 We are grateful to all study participants and the administration of Mbagathi County Hospital  
319 and Kiambu County Referral Hospital, Charly Huxford, Bella Hwang, Katija Pallot, Metrine Saisi,  
320 Elizabeth Kyala, Nancy Githinji, and Caroline Ndolo for their contributions and support during the  
321 study period. We highly appreciate the study nurses and clerks: Angela Wanjiru, Anastasia Gathigia,



322 Felix Kimani, Mercy Mutuku, Emmah Kinyanjui, Esther Muthoni, Faith Wairimu, Sidney Kipkorir,  
323 Verah Karasi, Victor Achiro, Kevin Bosek, Brian Ochieng and John Mboya for their support in  
324 collecting the data.

## References.

1. Hoot NR, Aronsky D. Systematic Review of Emergency Department Crowding: Causes, Effects, and Solutions. *Ann Emerg Med*. 2008;52(2).
2. Bernstein SL, Aronsky D, Duseja R, Epstein S, Handel D, Hwang U, et al. The effect of emergency department crowding on clinically oriented outcomes. *Acad Emerg Med*. 2009;16(1):1–10.
3. Janssen MA, van Achterberg T, Adriaansen MJ, Kampshoff CS, Mintjes-de Groot J. Adherence to the guideline “Triage in emergency departments”: A survey of Dutch emergency departments. *J Clin Nurs*. 2011;20(17–18):2458–68.
4. Zachariasse JM, Van Der Hagen V, Seiger N, Mackway-Jones K, Van Veen M, Moll HA. Performance of triage systems in emergency care: A systematic review and meta-analysis. *BMJ Open*. 2019;9(5):1–9.
5. Cheema B, Stephen C, Westwood A. Paediatric triage in South Africa. *SAJCH South African J Child Heal*. 2013;7(2):43–5.
6. Van Veen M, Moll HA. Reliability and validity of triage systems in paediatric emergency care. *Scand J Trauma Resusc Emerg Med*. 2009;17(1):1–8.
7. Hategeka C, Shoveller J, Tuyisenge L, Kenyon C, Cechetto DF, Lynd LD. Pediatric emergency care capacity in a low-resource setting: An assessment of district hospitals in Rwanda. *PLoS One*. 2017;12(3):1–13.
8. Irimu GW, Gathara D, Zurovac D, Kihara H, Maina C, Mwangi J, et al. Performance of Health Workers in the Management of Seriously Sick Children at a Kenyan Tertiary Hospital: Before and after a Training Intervention. *PLoS One* [Internet]. 2012;7(7):1–11. Available from: <https://doi.org/10.1371/journal.pone.0039964>
9. Baker T. Critical care in low-income countries. *Trop Med Int Heal*. 2009;14(2):143–8.
10. Mackway-Jones K, Marsden J, Windle J. *Emergency triage: Manchester triage group*. John Wiley & Sons; 2013.
11. Warren DW, Jarvis A, LeBlanc L, Gravel J. Canadian Association of Emergency Physicians; National Emergency Nurses Affiliation; Association des Médecins d’Urgence du Québec; Canadian Paediatric Society; Society of Rural Physicians of Canada. Revisions to the Canadian Triage and Acuity Scale paedia. *CJEM*. 2008;10(3):224–43.
12. Australasian College for Emergency Medicine. Guideline on The Implementation of The ATS. *Australas Coll Emerg Med* [Internet]. 2016;1–8. Available from: [https://acem.org.au/getmedia/51dc74f7-9ff0-42ce-872a-0437f3db640a/G24\\_04\\_Guidelines\\_on\\_Implementation\\_of\\_ATS\\_Jul-16.aspx](https://acem.org.au/getmedia/51dc74f7-9ff0-42ce-872a-0437f3db640a/G24_04_Guidelines_on_Implementation_of_ATS_Jul-16.aspx)
13. Gottschalk SB, Wood D, Devries S, Wallis LA, Bruijns S. The cape triage score: A new triage system South Africa. Proposal from the cape triage group. *Emerg Med J*. 2006;23(2):149–53.
14. Kenya Paediatric Association. *Emergency Triage Assessment and Treatment - Plus (ETAT+)*. 2013;
15. WHO. *Guideline: Updates on Paediatric Emergency Triage, Assessment and Treatment: Care of Critically-Ill Children*. In Geneva: World Health Organization; 2016.
16. Duke T. New WHO guidelines on emergency triage assessment and treatment. *Lancet*. 2016;387:721–4.
17. King C, Dube A, Zadutsa B, Banda L, Langton J, Desmond N, et al. Paediatric Emergency Triage, Assessment and Treatment (ETAT)—preparedness for implementation at primary care facilities in Malawi. *Glob Health Action* [Internet]. 2021;14(1). Available from: <https://doi.org/10.1080/16549716.2021.1989807>
18. Hategeka C, Mwai L, Tuyisenge L. Implementing the Emergency Triage, Assessment and Treatment plus admission care (ETAT+) clinical practice guidelines to improve quality of hospital care in Rwandan district hospitals: healthcare workers’ perspectives on relevance and challenges. *BMC Health Serv Res* [Internet]. 2017;17(1):256. Available from: <https://doi.org/10.1186/s12913-017-2193-4>

19. Mawji A, Li E, Dunsmuir D, Komugisha C, Novakowski SK, Wiens MO, et al. Smart triage: Development of a rapid pediatric triage algorithm for use in low-and-middle income countries. *Front Pediatr*. 2022;10(November):1–9.
20. Zachariasse JM, Nieboer D, Oostenbrink R, Moll HA, Steyerberg EW. Multiple performance measures are needed to evaluate triage systems in the emergency department. *J Clin Epidemiol*. 2018;94:27–34.
21. Mawji A, Li E, Komugisha C, Akech S, Dunsmuir D, Wiens MO, et al. Smart triage: Triage and management of sepsis in children using the point-of-care Pediatric Rapid Sepsis Trigger (PRST) tool. *BMC Health Serv Res*. 2020;20(1):1–13.
22. Gan H, Karlen W, Dunsmuir D, Zhou G, Chiu M, Dumont GA, et al. The Performance of a Mobile Phone Respiratory Rate Counter Compared to the WHO ARI Timer. *J Healthc Eng*. 2015;6(4):691–703.
23. Harris PA, Taylor R, Thielke R, Payne J, Gonzalez N, Conde JG. Research electronic data capture (REDCap)--a metadata-driven methodology and workflow process for providing translational research informatics support. *J Biomed Inform*. 2009 Apr;42(2):377–81.
24. Magalhães-Barbosa MC, Robaina JR, Prata-Barbosa A, Lopes CDS. Reliability of triage systems for paediatric emergency care: A systematic review. *Emerg Med J*. 2019;36(4):231–8.
25. Murali M, Inada-Kim M. Early warning scores: the case for aggregate vs. single extreme parameter activation to detect patient deterioration. *Anaesthesia*. 2023;803–6.

## Figures

**Fig 1: Participant flow diagram**

**Fig 2: All children.** Change in the classification of children presenting to the emergency department by triage systems.

**Fig 3: Admitted children.** Change in the classification by triage systems for admitted children.

**Fig 4: Mortality.** The change in the classification by triage system for children who died.

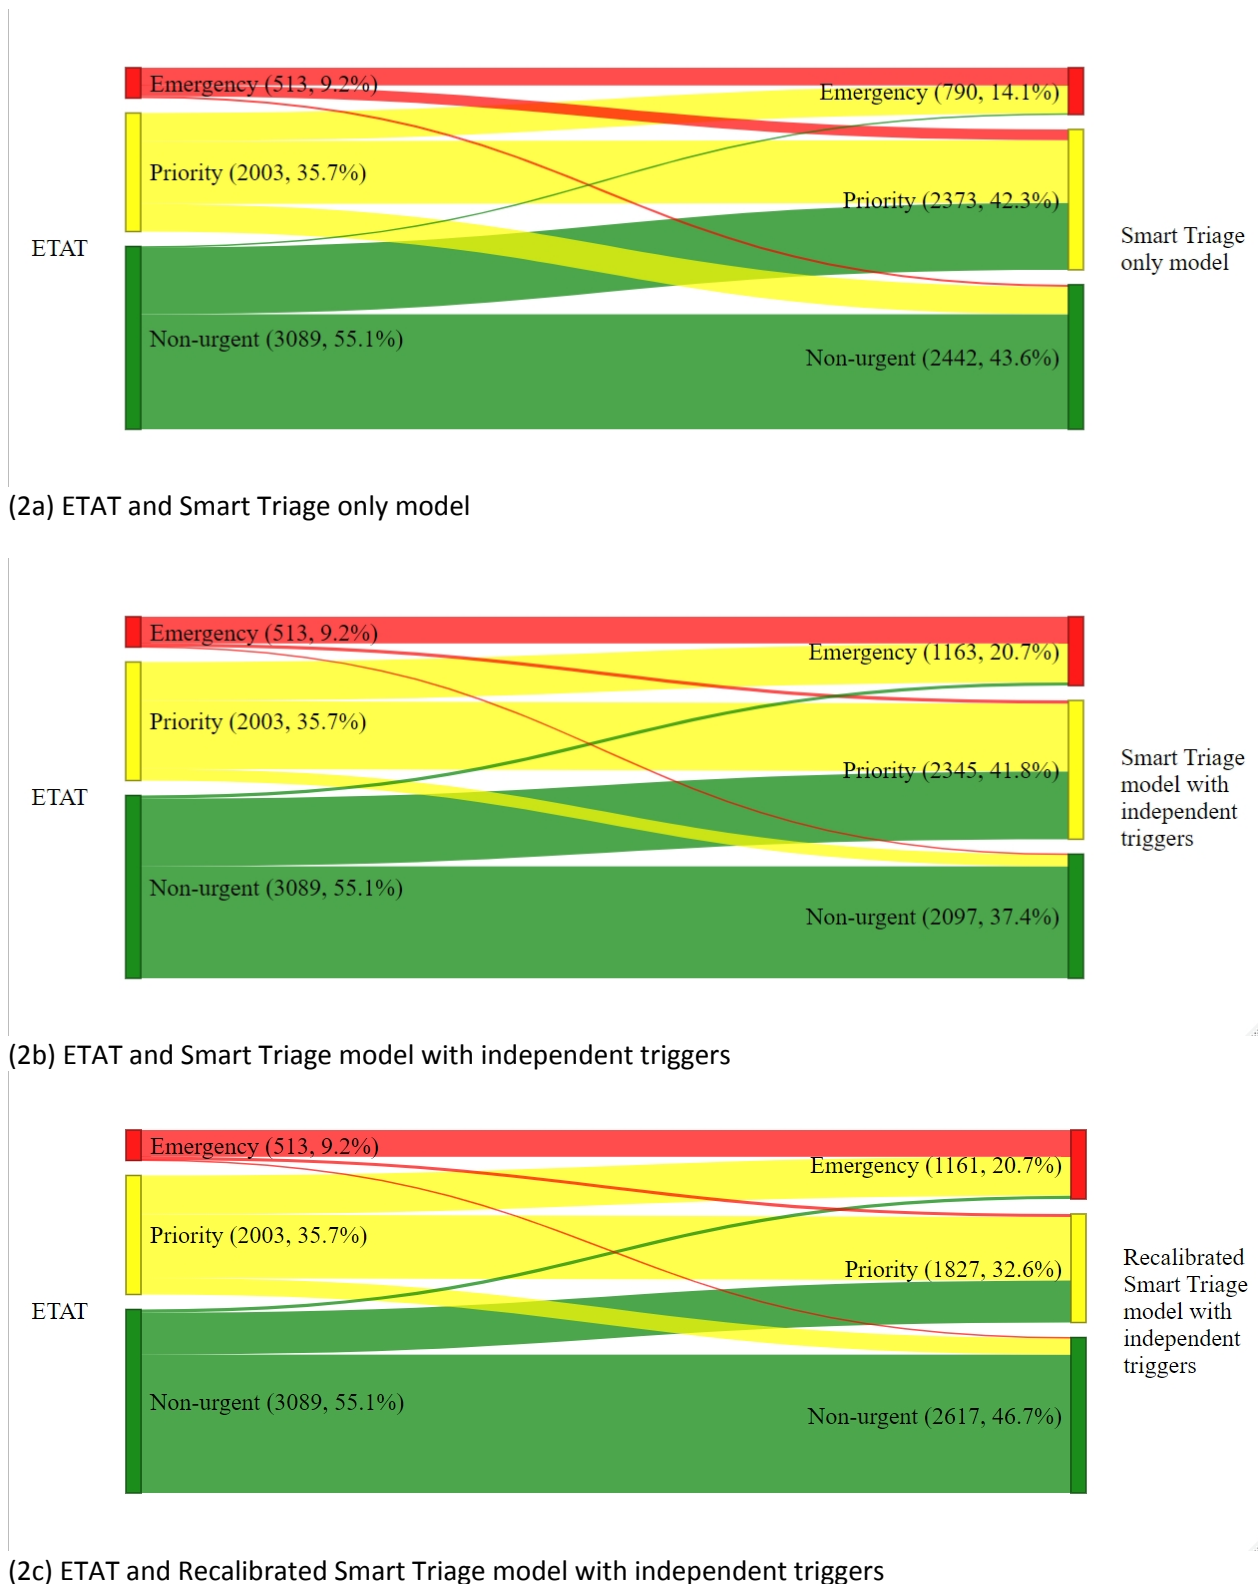

**Figure 2.** All children: Change in the classification of children presenting to the emergency department by triage systems.

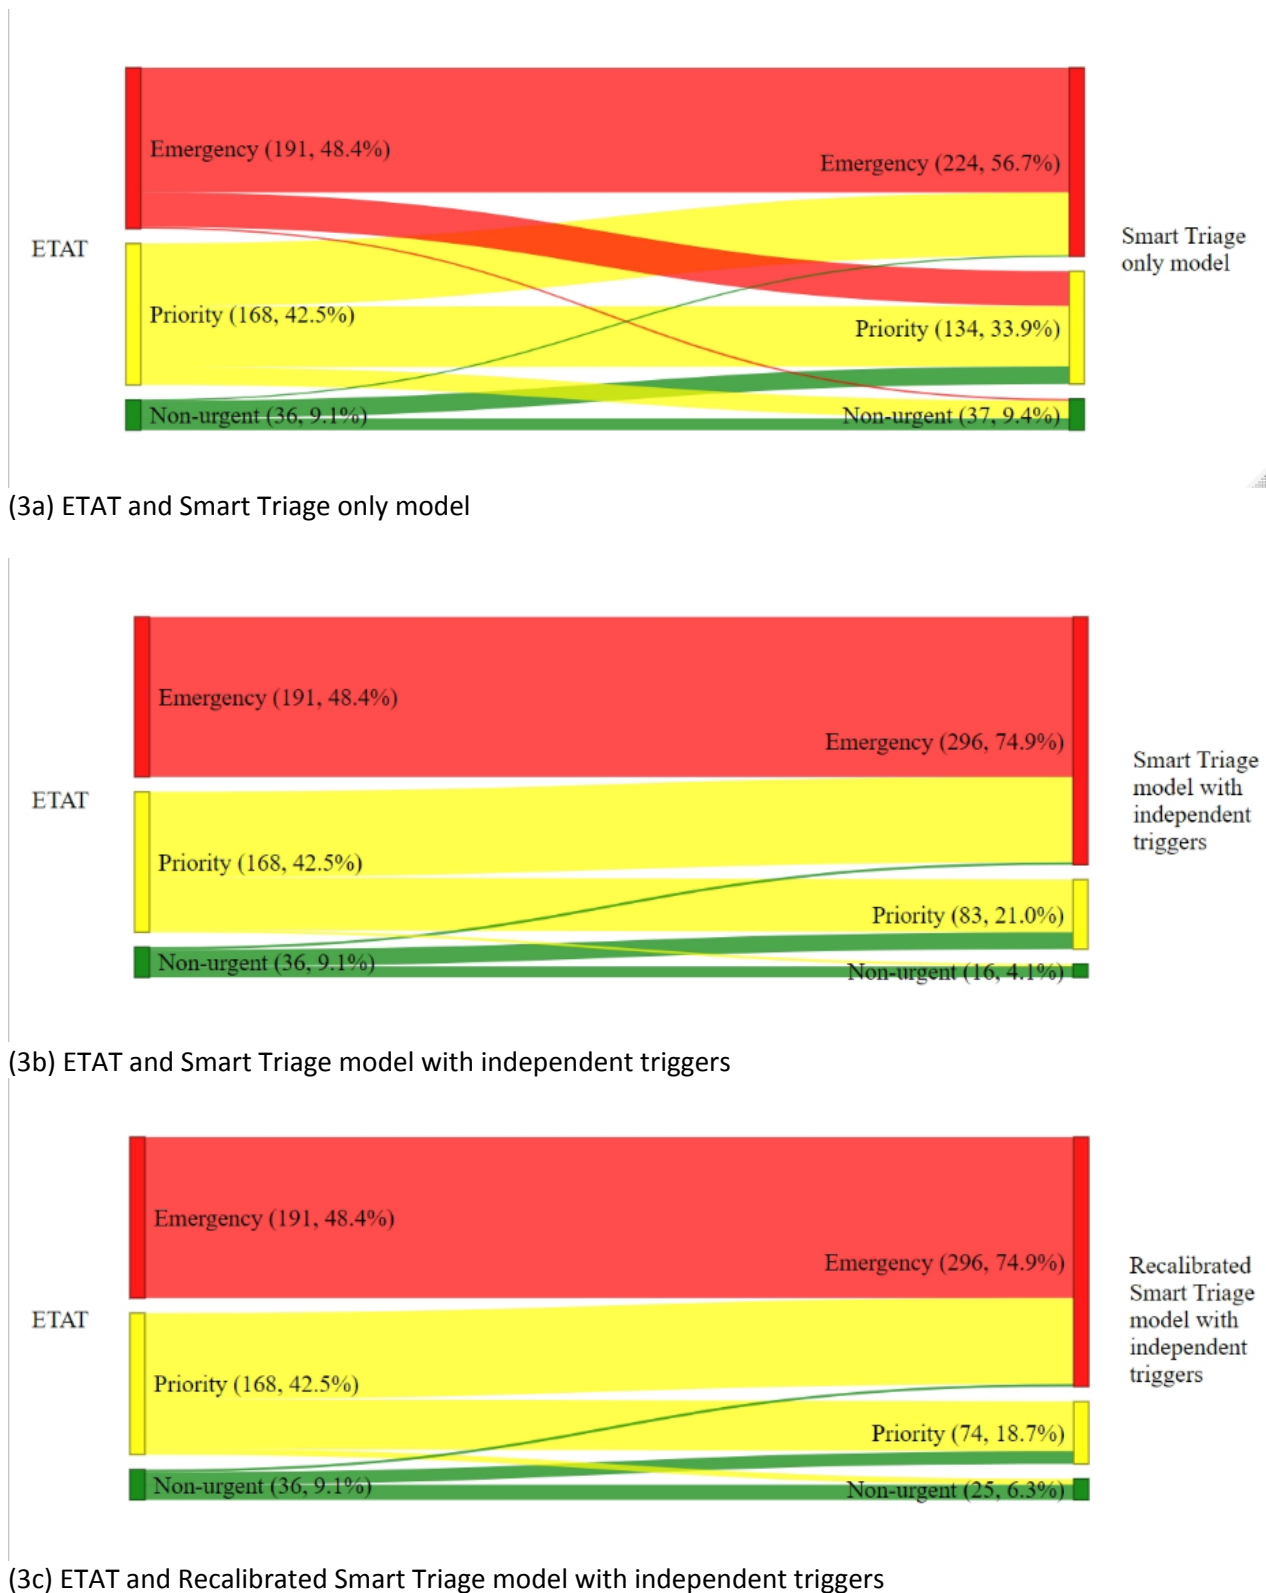

**Figure 3.** Admitted children: Change in the classification by triage systems for admitted children.

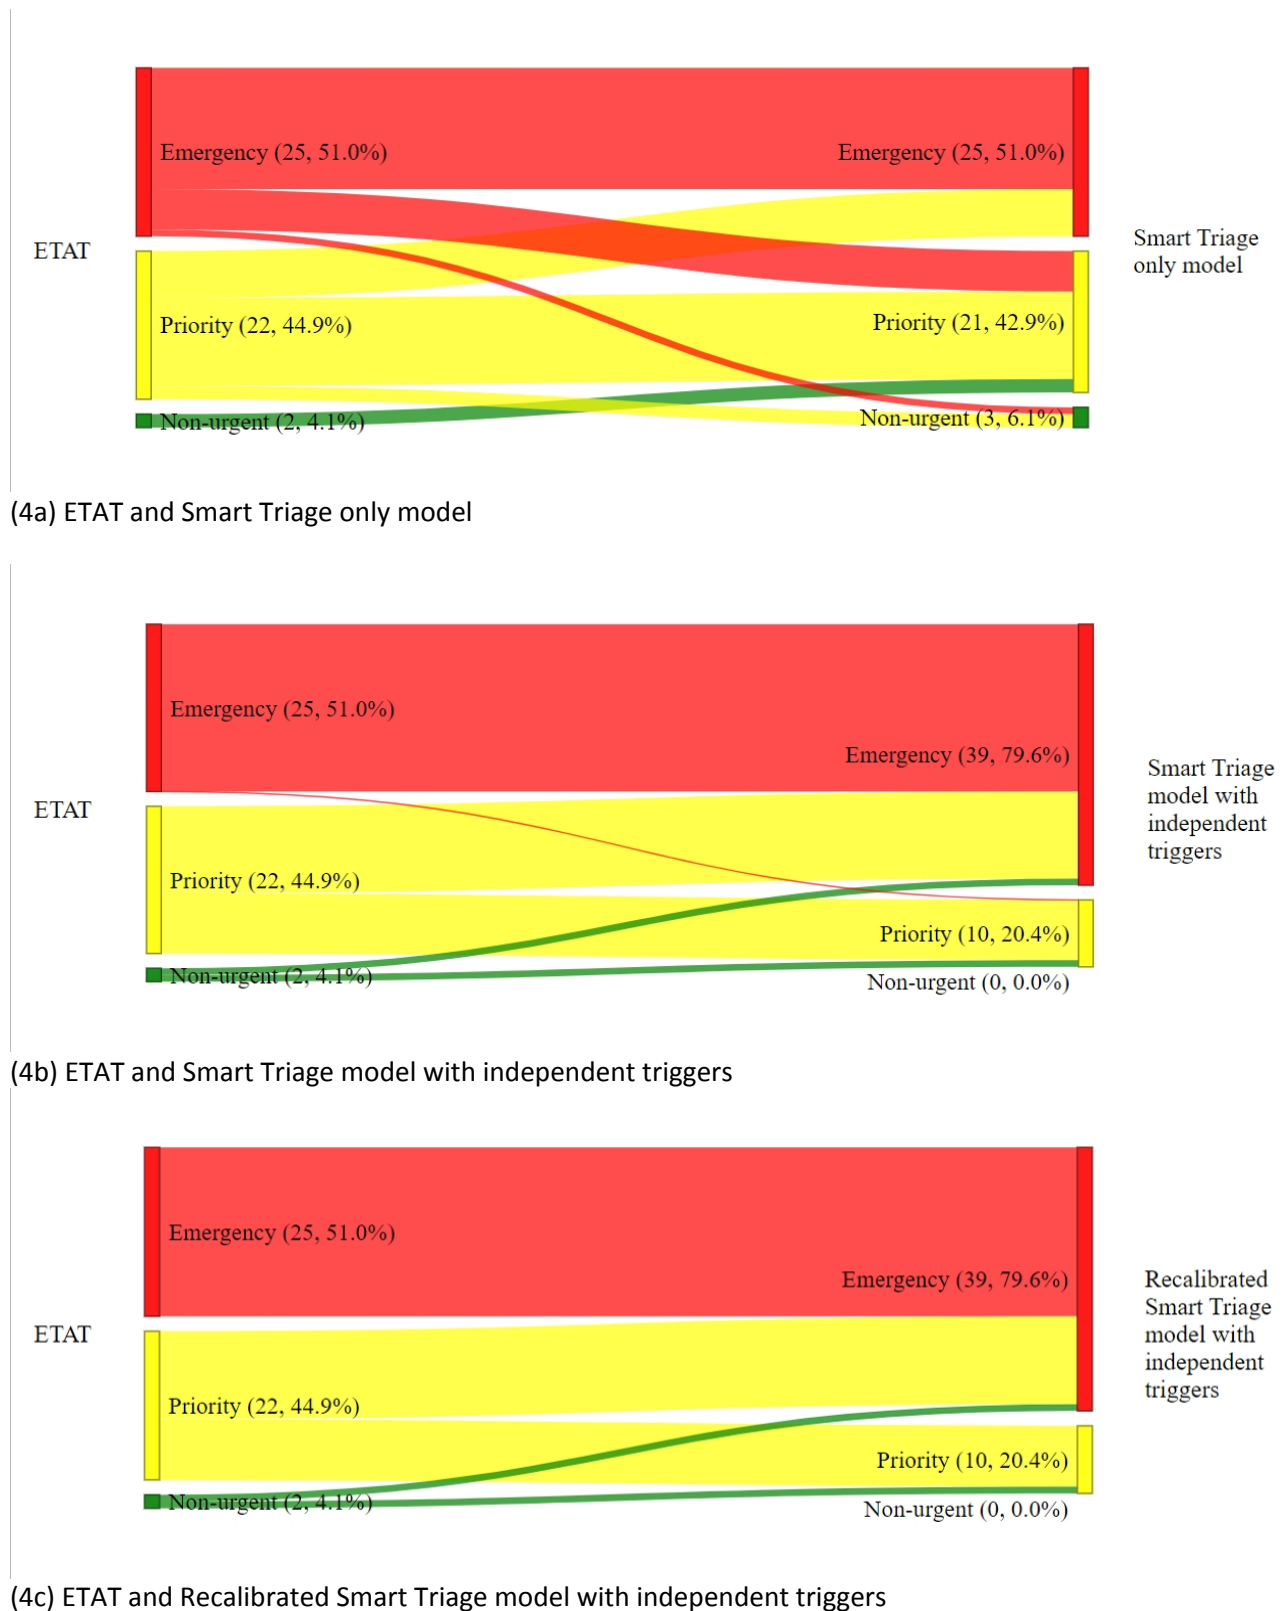

**Figure 4.** Mortality: Change in the classification by triage system for children who died.

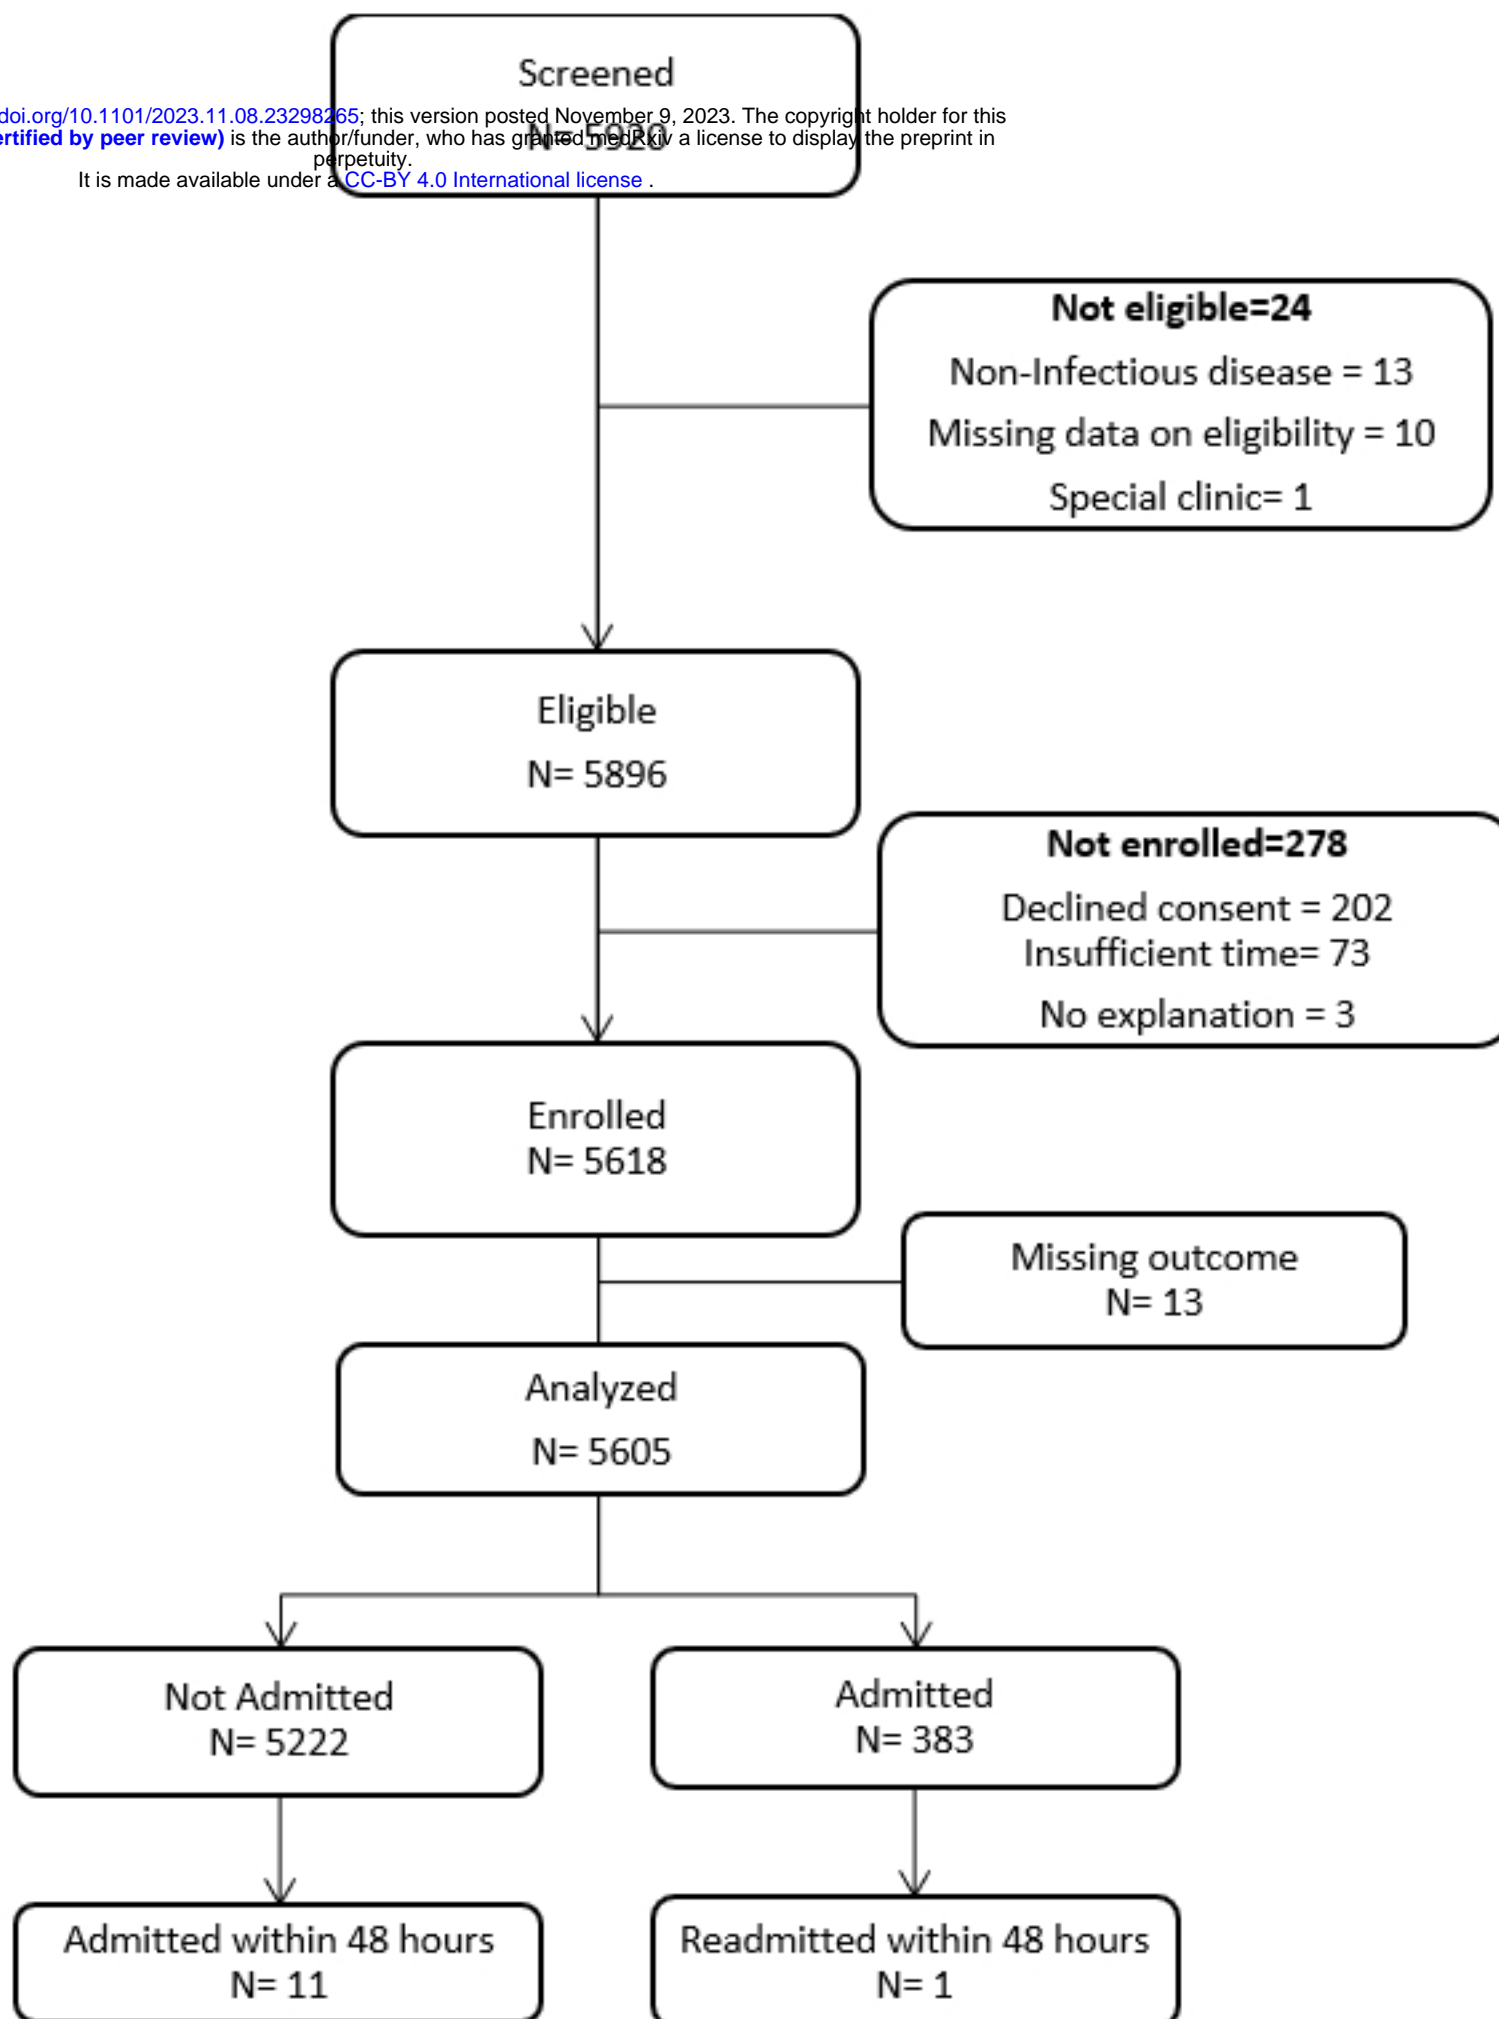

Figure



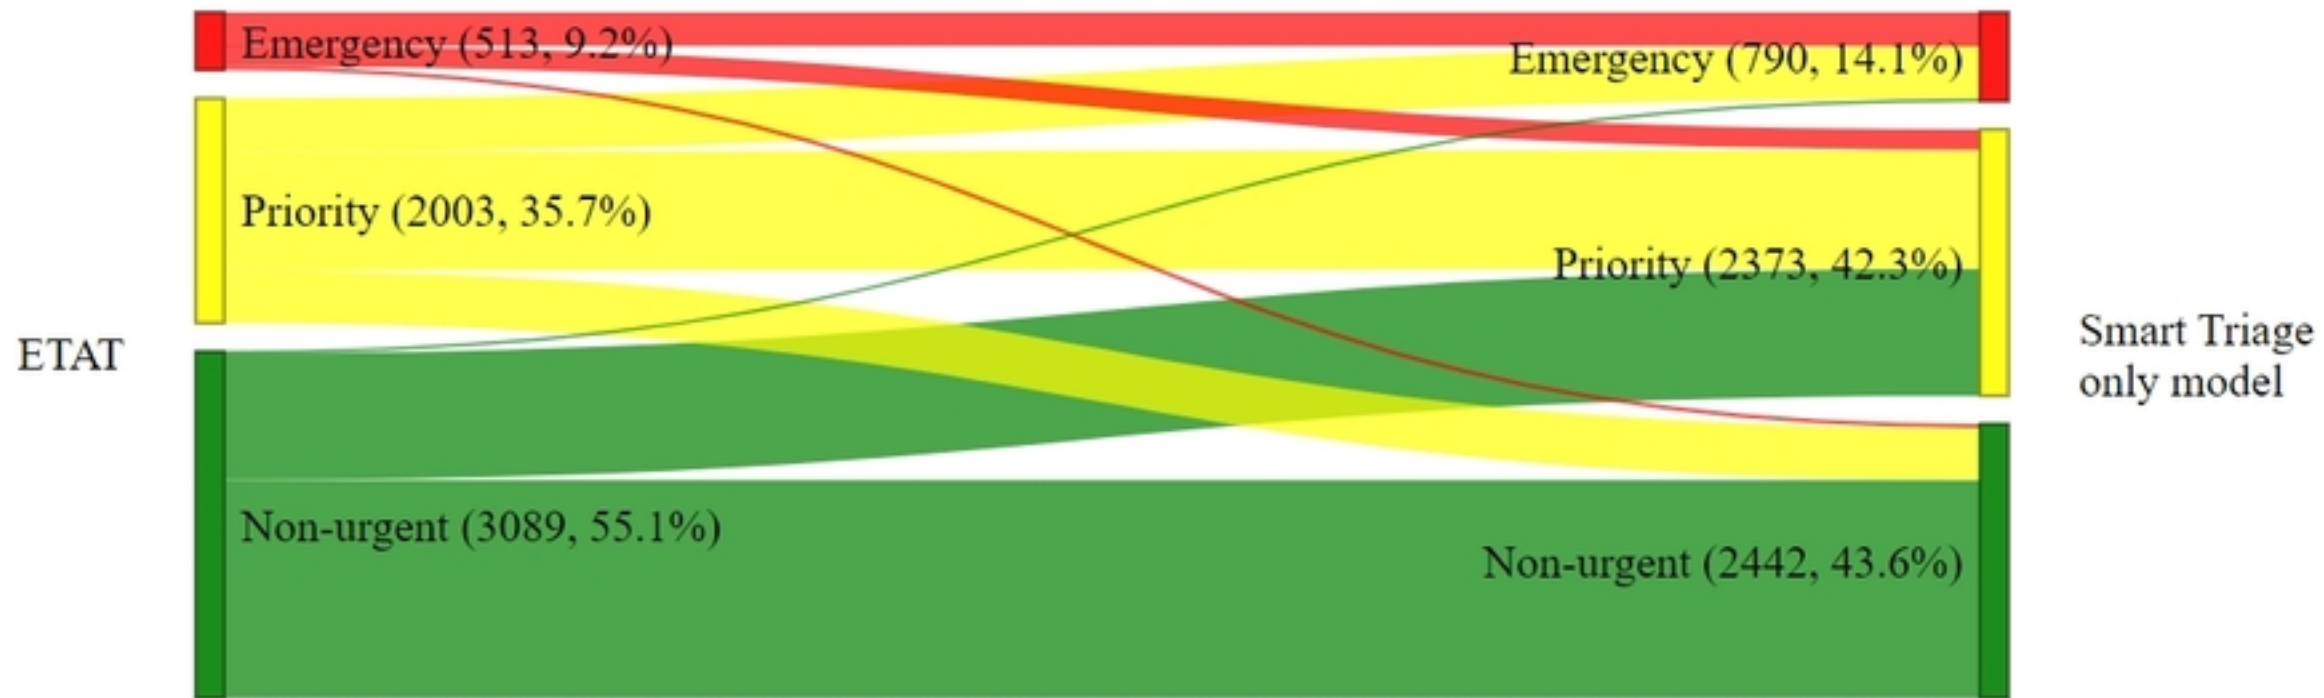

Figure

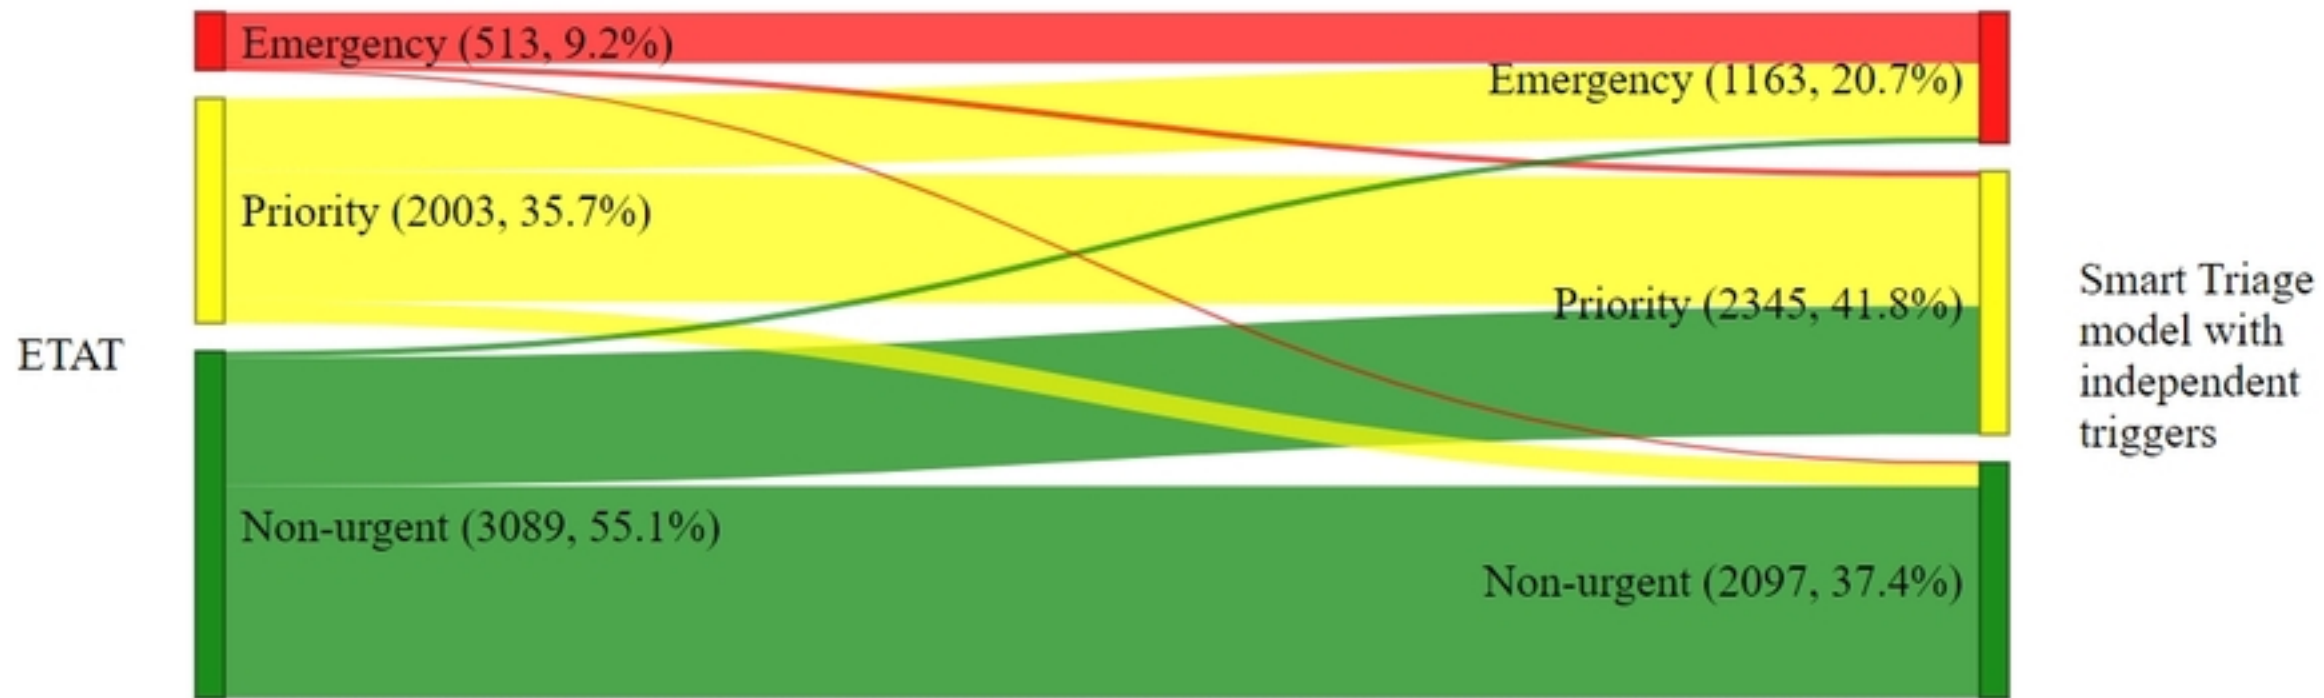

Figure

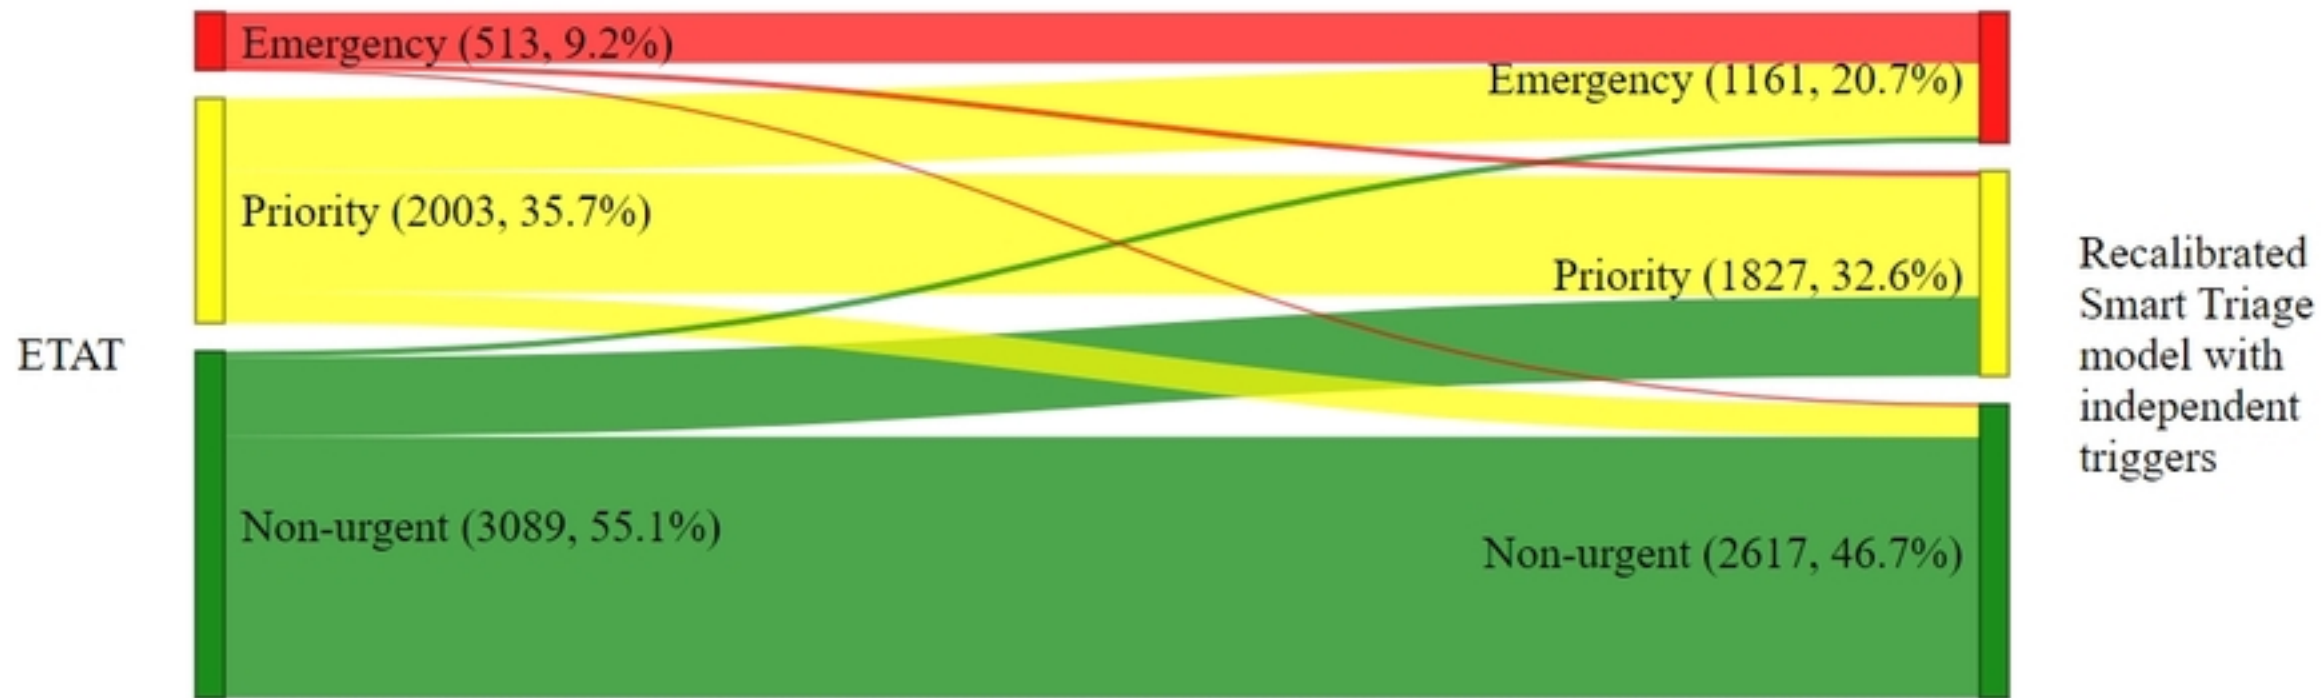

Figure

ETAT

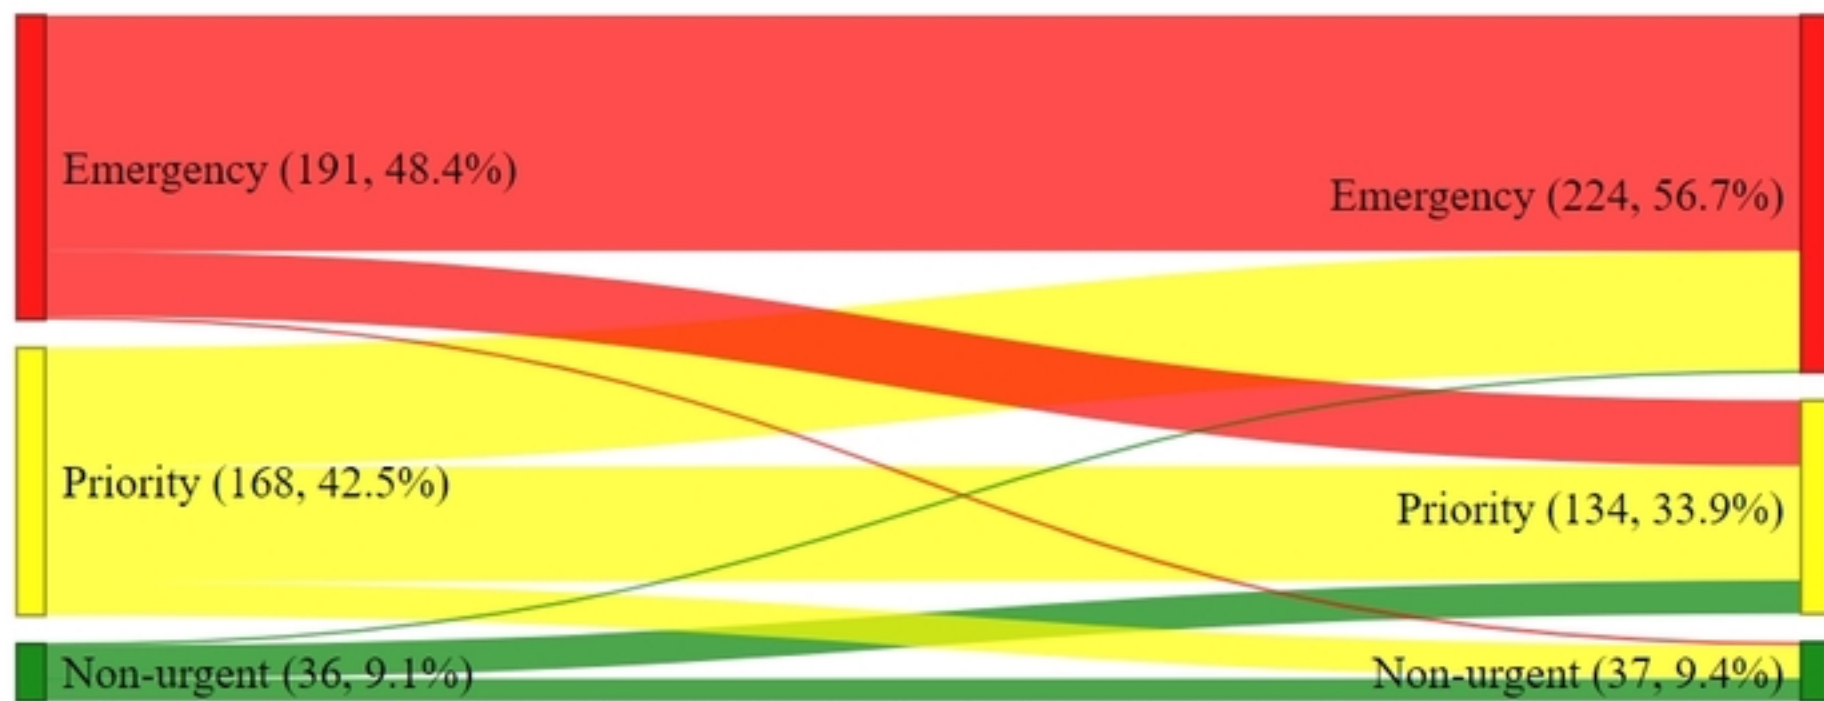

Smart Triage  
only model

Figure

ETAT

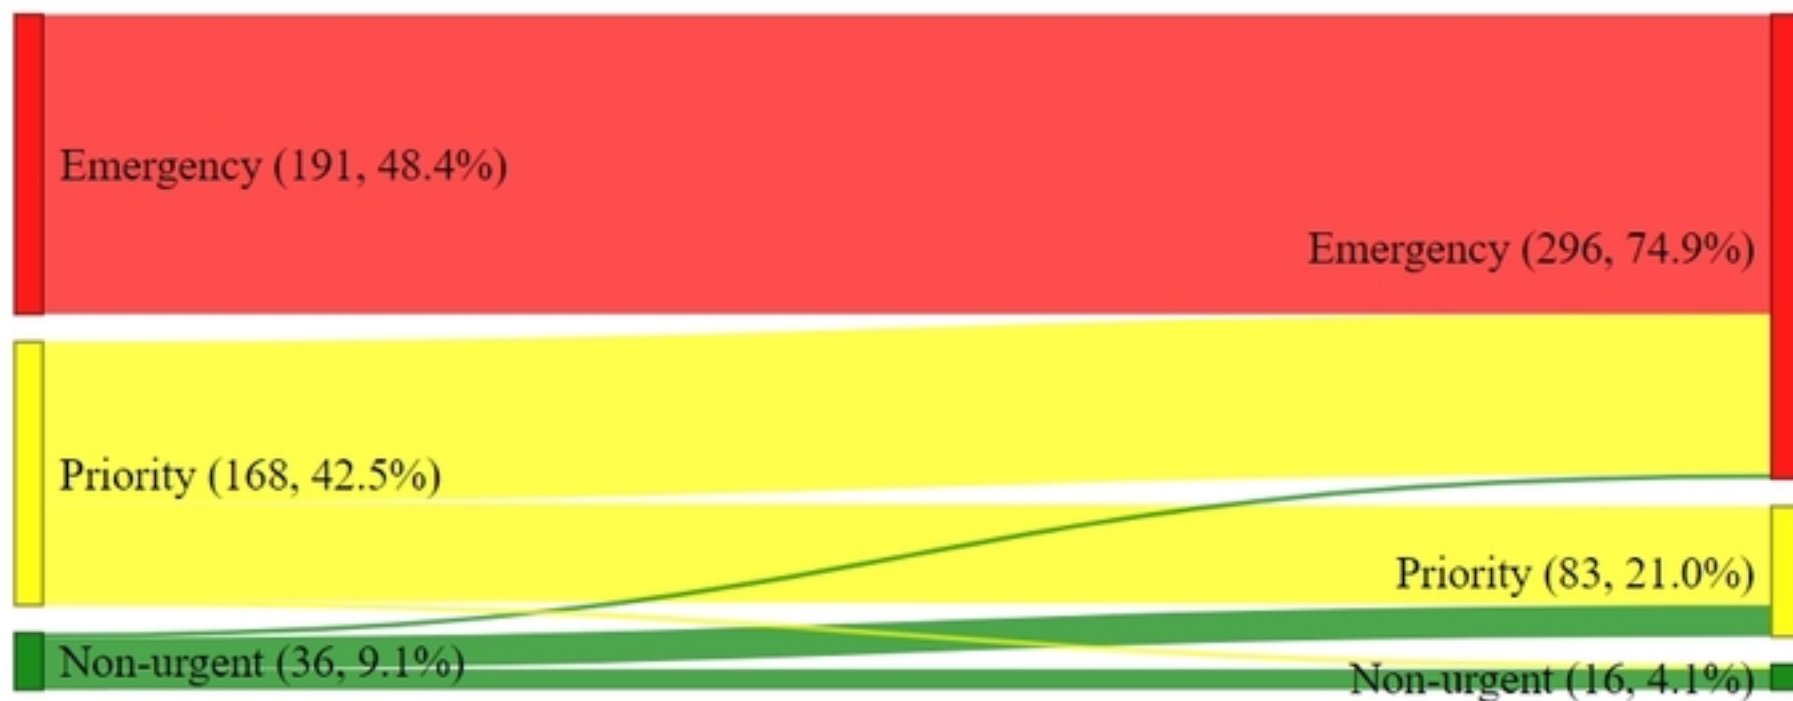

Smart Triage  
model with  
independent  
triggers

Figure

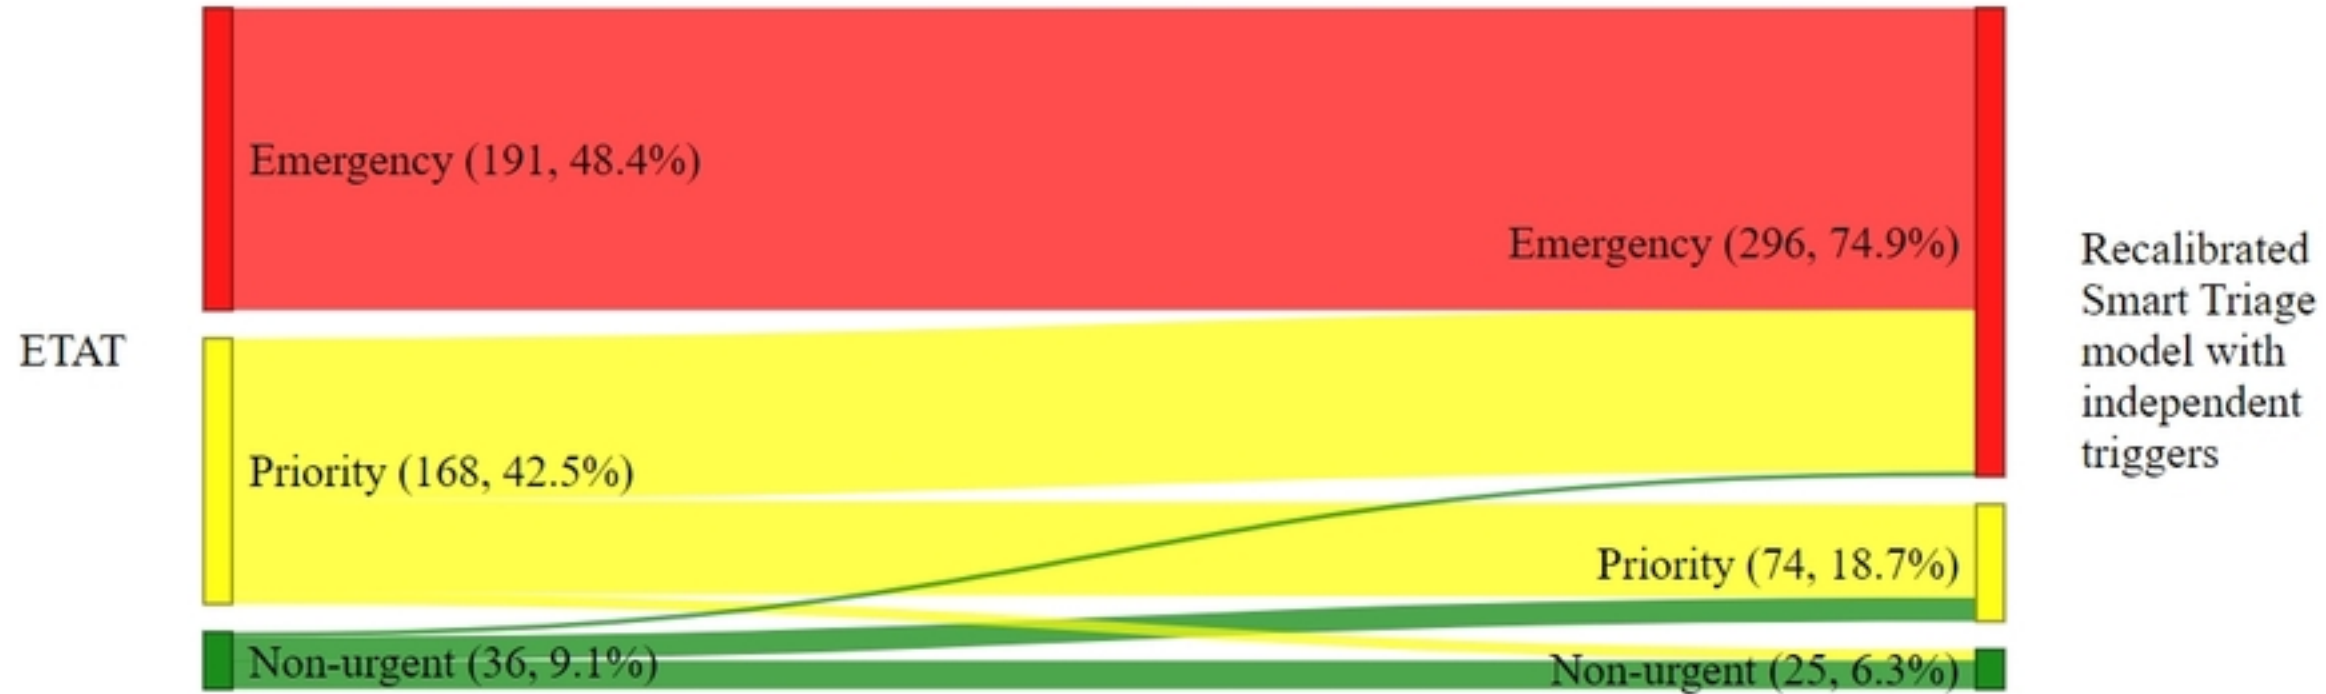

Figure

ETAT

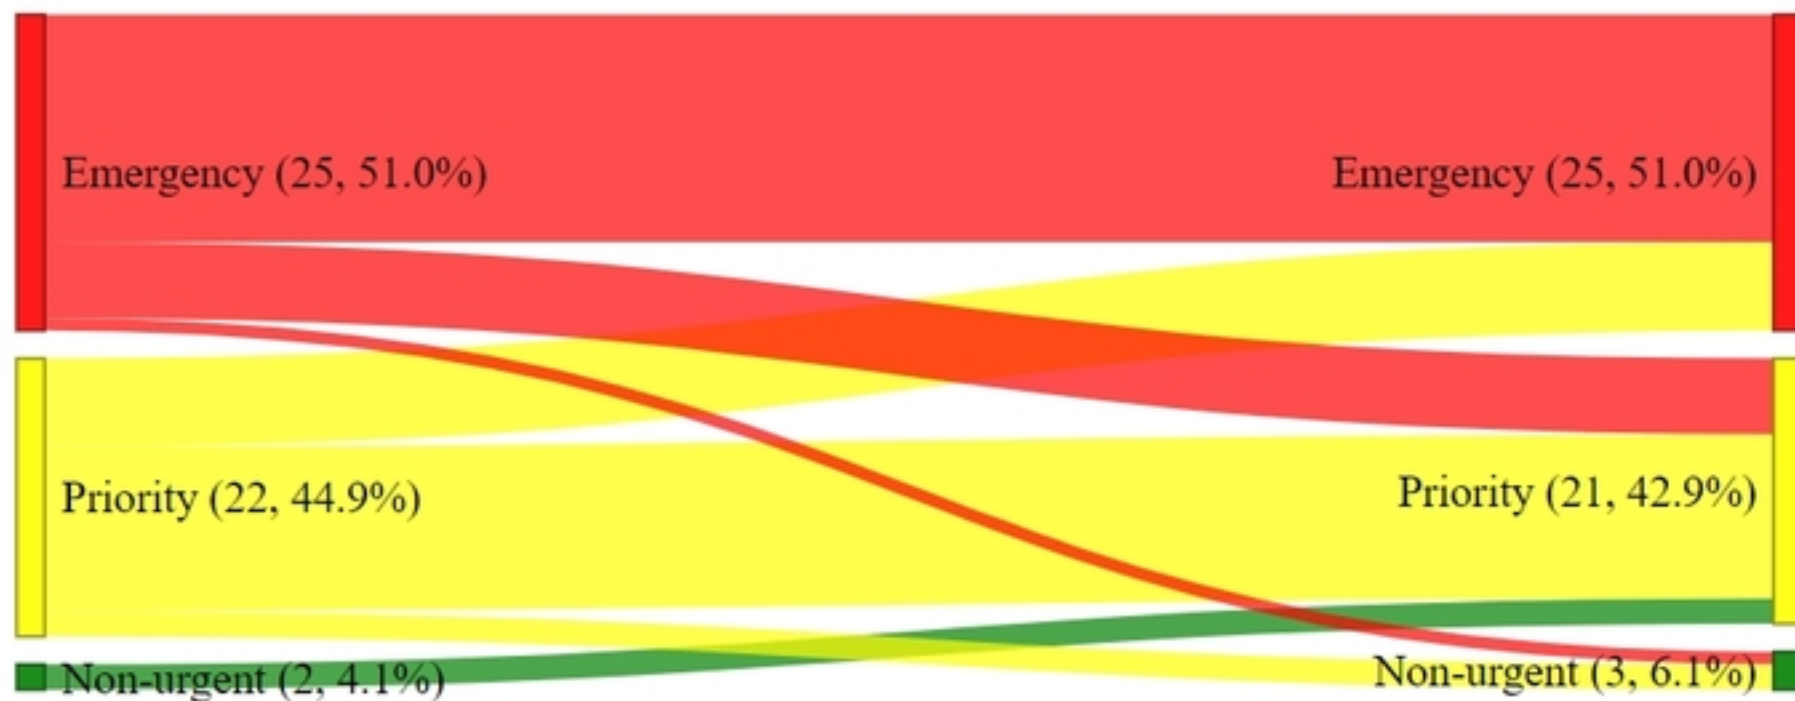

Smart Triage  
only model

Figure

ETAT

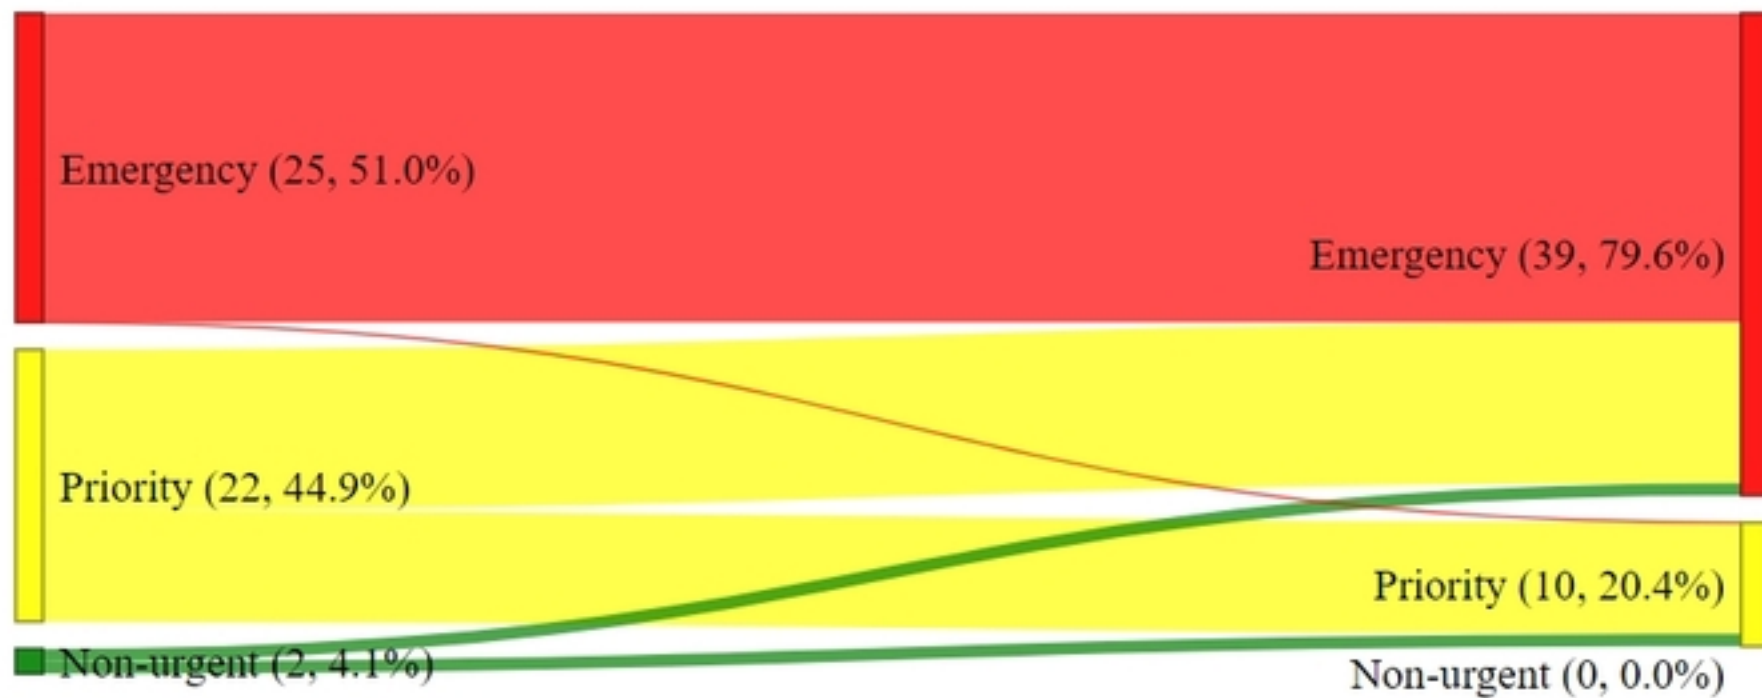

Smart Triage  
model with  
independent  
triggers

Figure



ETAT

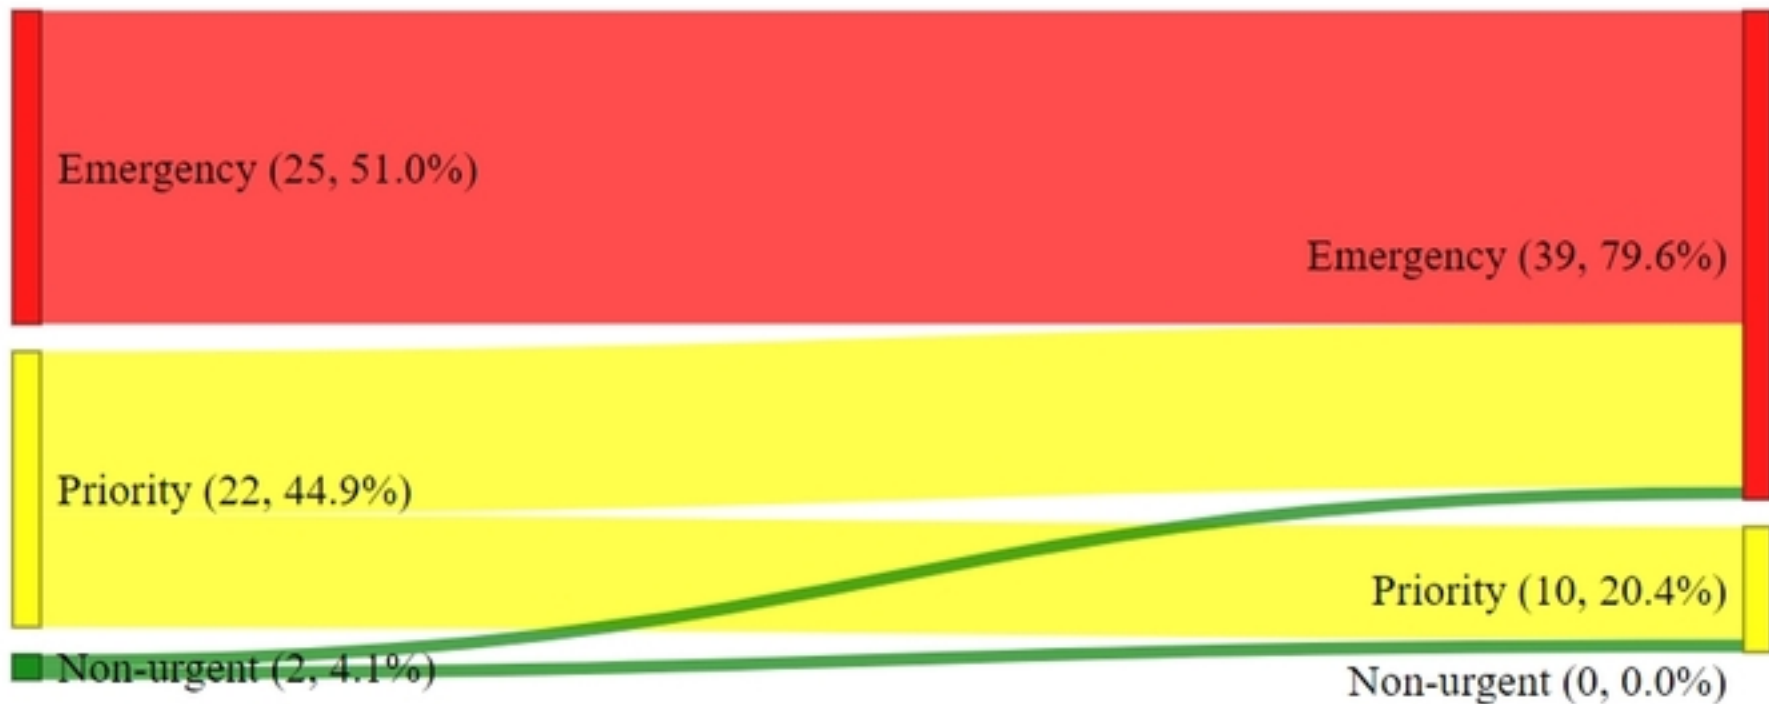

Recalibrated  
Smart Triage  
model with  
independent  
triggers

Figure
